# Supplementary material for: Holospiniferoside: A New Antitumor Cerebroside from The Red Sea Cucumber Holothuria spinifera: In Vitro and In Silico Studies
Source: PubMed Central journal article supplement (PMC8001240; doi:10.3390/molecules26061555), 2021-03-12
Supplement: molecules-26-01555-s001.pdf [file molecules-26-01555-s001.pdf]

Article

# Holospiniferoside: A New Antitumor Cerebroside from The Red Sea Cucumber *Holothuria spinifera*: In Vitro and In Silico Studies

Enas E. Eltamany <sup>1,†</sup>, Usama Ramadan Abdelmohsen <sup>2,3,†</sup>, Dina M. Hal <sup>1</sup>, Amany K. Ibrahim <sup>1</sup>, Hashim A. Hassanean <sup>1</sup>, Reda F.A. Abdelhameed <sup>1</sup>, Tarek A Temraz <sup>4</sup>, Dina Hajjar <sup>5</sup>, Arwa A. Makki <sup>5</sup>, Omnia Magdy Hendawy <sup>6,7</sup>, Asmaa M. AboulMagd <sup>8</sup>, Khayrya A. Youssif <sup>9</sup>, Gerhard Bringmann <sup>10,\*</sup>, Safwat A. Ahmed <sup>1,\*</sup>

<sup>1</sup> Department of Pharmacognosy, Faculty of Pharmacy, Suez Canal University 41522 Ismailia, Egypt; enastamany@gmail.com (E.E.E.); dina\_hal@pharm.suez.edu.eg (D.M.H.); am\_kamal66@yahoo.com (A.K.I.); amahdali@gmail.com (H.A.H.); omarreda\_70@yahoo.com (R.F.A.A.)

<sup>2</sup> Department of Pharmacognosy, Faculty of Pharmacy, Deraya University 61111 New Minia, Egypt; usama.ramadan@mu.edu.eg

<sup>3</sup> Department of Pharmacognosy, Faculty of Pharmacy, Minia University 61519 Minia, Egypt

<sup>4</sup> Department of Marine Science, Faculty of Science, Suez Canal University 41522 Ismailia, Egypt; ttemraz@science.suez.edu.eg

<sup>5</sup> Department of Biochemistry, Collage of Science, University of Jeddah 80203 Jeddah, Saudi Arabia; dhajjar@uj.edu.sa (D.H.); amaki@uj.edu.sa (A.A.M.)

<sup>6</sup> Department of Chemistry of Pharmacology, Faculty of Pharmacy, Jouf University, 2014, Saudi Arabia; omhendawy@ju.edu

<sup>7</sup> Department of clinical Pharmacology, Faculty of Medicine, Beni Suef University, 62513 Beni-Suef, Egypt

<sup>8</sup> Pharmaceutical Chemistry Department, Faculty of Pharmacy, Nahda University, 62513 Beni Suef, Egypt; asmaa.aboulmaged@nub.edu.eg

<sup>9</sup> Department of Pharmacognosy, Faculty of Pharmacy, Modern University for Technology and Information 12585 Cairo, Egypt; khayrya.youssif@gmail.com

<sup>10</sup> Institute of Organic Chemistry, University of Würzburg, Am Hubland, 97074 Würzburg, Germany

\* Correspondence: bringman@chemie.uni-wuerzburg.de (G.B.); safwat\_aa@yahoo.com (S.A.A.); +49-931-318 5323 (G.B.); +20-010-92638387 (S.A.A.); +49-931-318 4755 (G.B.); +20-064-3230741 (S.A.A.)

† These authors contributed equally to this work.

|                                                                                                                                                                            |    |
|----------------------------------------------------------------------------------------------------------------------------------------------------------------------------|----|
| <b><u>Figure S1: HRMS of Compound 1 (M+Na)<sup>+</sup></u></b> .....                                                                                                       | 4  |
| <b><u>Figure S2: <sup>1</sup>H-NMR spectrum of compound 1 in (C<sub>5</sub>D<sub>5</sub>N, 400 MHz)</u></b> .....                                                          | 5  |
| <b><u>Figure S3: Partial expansion of the <sup>1</sup>H-NMR spectrum of compound 1 in (C<sub>5</sub>D<sub>5</sub>N, 400 MHz)</u></b> .....                                 | 6  |
| <b><u>Figure S4: Partial expansion of the <sup>1</sup>H-NMR spectrum of compound 1 in (C<sub>5</sub>D<sub>5</sub>N, 400 MHz)</u></b> .....                                 | 7  |
| <b><u>Figure S5: Partial expansion of the <sup>1</sup>H-NMR spectrum of compound 1 in (C<sub>5</sub>D<sub>5</sub>N, 400 MHz)</u></b> .....                                 | 8  |
| <b><u>Figure S6: <sup>13</sup>C-NMR spectrum of compound 1 in (C<sub>5</sub>D<sub>5</sub>N, 100 MHz)</u></b> .....                                                         | 9  |
| <b><u>Figure S7: Partial expansion of the <sup>13</sup>C-NMR spectrum of compound 1 in (C<sub>5</sub>D<sub>5</sub>N, 100 MHz)</u></b> .....                                | 10 |
| <b><u>Figure S8: Partial expansion of the <sup>13</sup>C-NMR spectrum of compound 1 in (C<sub>5</sub>D<sub>5</sub>N, 100 MHz)</u></b> .....                                | 11 |
| <b><u>Figure S9: Partial expansion of the <sup>13</sup>C-NMR spectrum of compound 1 in (C<sub>5</sub>D<sub>5</sub>N, 100 MHz)</u></b> .....                                | 12 |
| <b><u>Figure S10: IR spectrum of compound 1</u></b> .....                                                                                                                  | 13 |
| <b><u>Figure S11: HRMS of <math>\alpha</math>-hydroxy fatty acid methyl ester resulted from hydrolysis of compound 1</u></b> .....                                         | 14 |
| <b><u>Figure S12: GC-MS analysis of fatty acids methyl ester carried out after oxidation of <math>\alpha</math>-hydroxy fatty acid methyl ester (Compound 1)</u></b> ..... | 15 |
| <b><u>Figure S13: <sup>1</sup>H-NMR spectrum of compound 2 in (C<sub>5</sub>D<sub>5</sub>N, 400 MHz)</u></b> .....                                                         | 16 |
| <b><u>Figure S14: <sup>13</sup>C-NMR spectrum of compound 2 in (C<sub>5</sub>D<sub>5</sub>N, 100 MHz)</u></b> .....                                                        | 17 |
| <b><u>Figure S15: <sup>1</sup>H -NMR spectrum of Compound 3 in (C<sub>5</sub>D<sub>5</sub>N, 400 MHz)</u></b> .....                                                        | 18 |
| <b><u>Figure S16: <sup>13</sup>C-NMR spectrum of Compound 3 (C<sub>5</sub>D<sub>5</sub>N, 100 MHz)</u></b> .....                                                           | 19 |
| <b><u>Figure S17: HRMS of Compound 4 (M+H)<sup>+</sup></u></b> .....                                                                                                       | 20 |
| <b><u>Figure S18: IR Compound 4 (M+H)<sup>+</sup></u></b> .....                                                                                                            | 21 |
| <b><u>Figure S19: <sup>1</sup>H-NMR spectrum of compound 4 in (CDCl<sub>3</sub>, 400 MHz)</u></b> .....                                                                    | 22 |

---

|                                                                                                                                                       |    |
|-------------------------------------------------------------------------------------------------------------------------------------------------------|----|
| <b><u>Figure S20: Partial expansions of the <math>^1\text{H}</math>-NMR spectrum of compound 4 in (<math>\text{CDCl}_3</math>, 400 MHz)</u></b> ..... | 23 |
| <b><u>Figure S21: Partial expansions of the <math>^1\text{H}</math>-NMR spectrum of compound 4 in (<math>\text{CDCl}_3</math>, 400 MHz)</u></b> ..... | 24 |
| <b><u>FigureS 22: Partial expansions of the <math>^1\text{H}</math>-NMR spectrum of compound 4 in (<math>\text{CDCl}_3</math>, 400 MHz)</u></b> ..... | 25 |
| <b><u>Figure S23: <math>^{13}\text{C}</math>-NMR spectrum of compound 4 in (<math>\text{CDCl}_3</math>, 400 MHz)</u></b> .....                        | 26 |
| <b><u>Figure S24: Partial expansion <math>^{13}\text{C}</math>-NMR spectrum of compound 4 in (<math>\text{CDCl}_3</math>, 400 MHz)</u></b> .....      | 27 |
| <b><u>Figure S25: Partial expansion <math>^{13}\text{C}</math>-NMR spectrum of compound 4 in (<math>\text{CDCl}_3</math>, 400 MHz)</u></b> .....      | 28 |
| <b><u>Figure S26: Partial expansion <math>^{13}\text{C}</math>-NMR spectrum of compound 4 in (<math>\text{CDCl}_3</math>, 400 MHz)</u></b> .....      | 29 |
| <b><u>Figure S27: MS spectrum for 10-Heptadecenoic acid (z)- methyl ester</u></b> .....                                                               | 30 |
| <b><u>Figure S28: MS spectrum for 9-Octadecenoic acid (z)-methyl ester</u></b> .....                                                                  | 31 |
| <b><u>Figure S29: <math>^1\text{H}</math> -NMR spectrum of Compound 5 in (<math>\text{CDCl}_3</math>, 400 MHz)</u></b> .....                          | 32 |
| <b><u>Figure S30: <math>^{13}\text{C}</math>-NMR spectrum of Compound 5 (<math>\text{CDCl}_3</math>, 100 MHz)</u></b> .....                           | 33 |
| <b><u>Figure S31: DEPT spectrum of Compound 5 in (<math>\text{CDCl}_3</math>, 100 MHz)</u></b> .....                                                  | 34 |

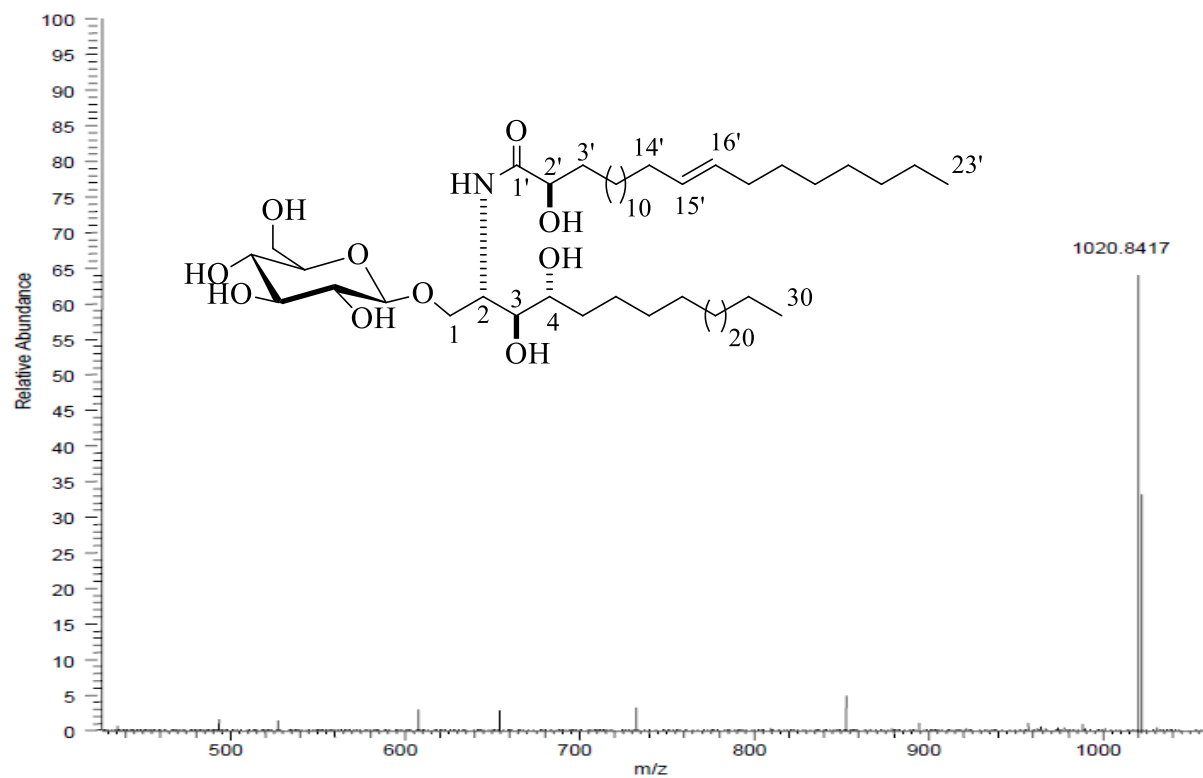

**Figure S1: HRMS of Compound 1  $(M+Na)^+$ .**

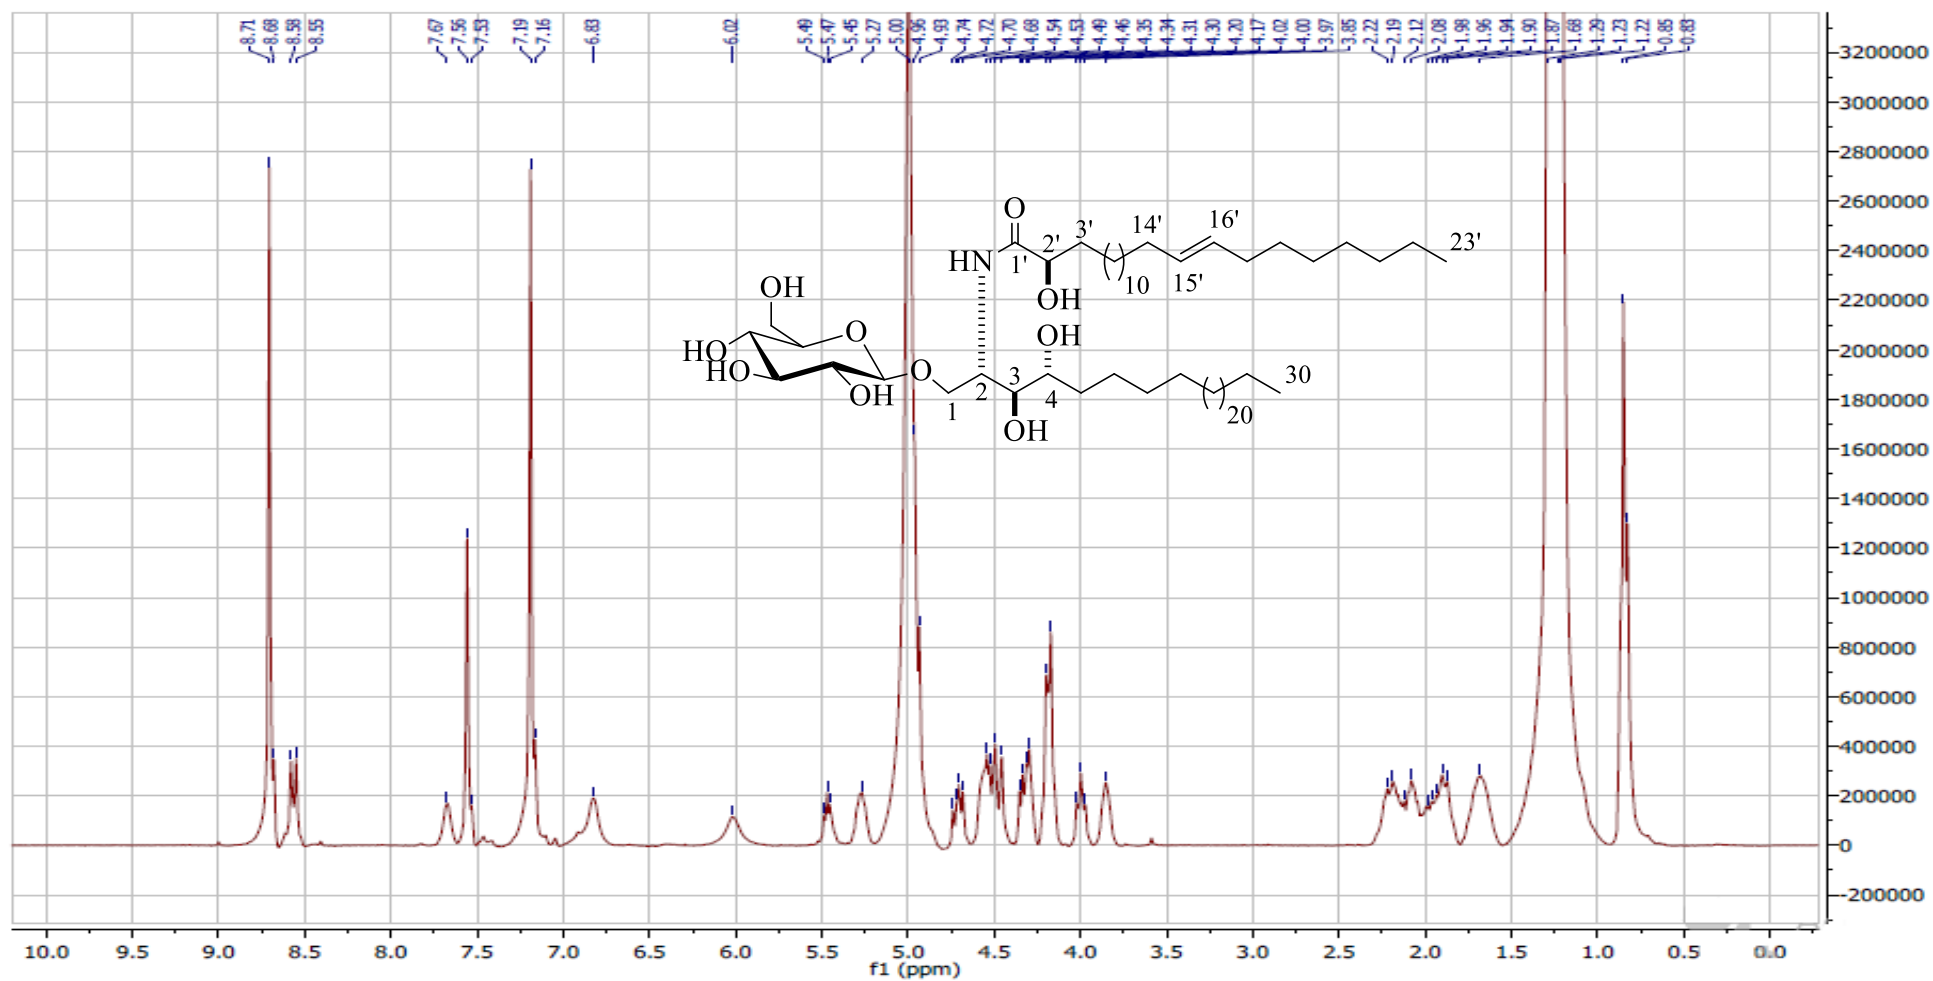

Figure S2: <sup>1</sup>H-NMR spectrum of compound 1 in (C<sub>5</sub>D<sub>5</sub>N, 400 MHz).

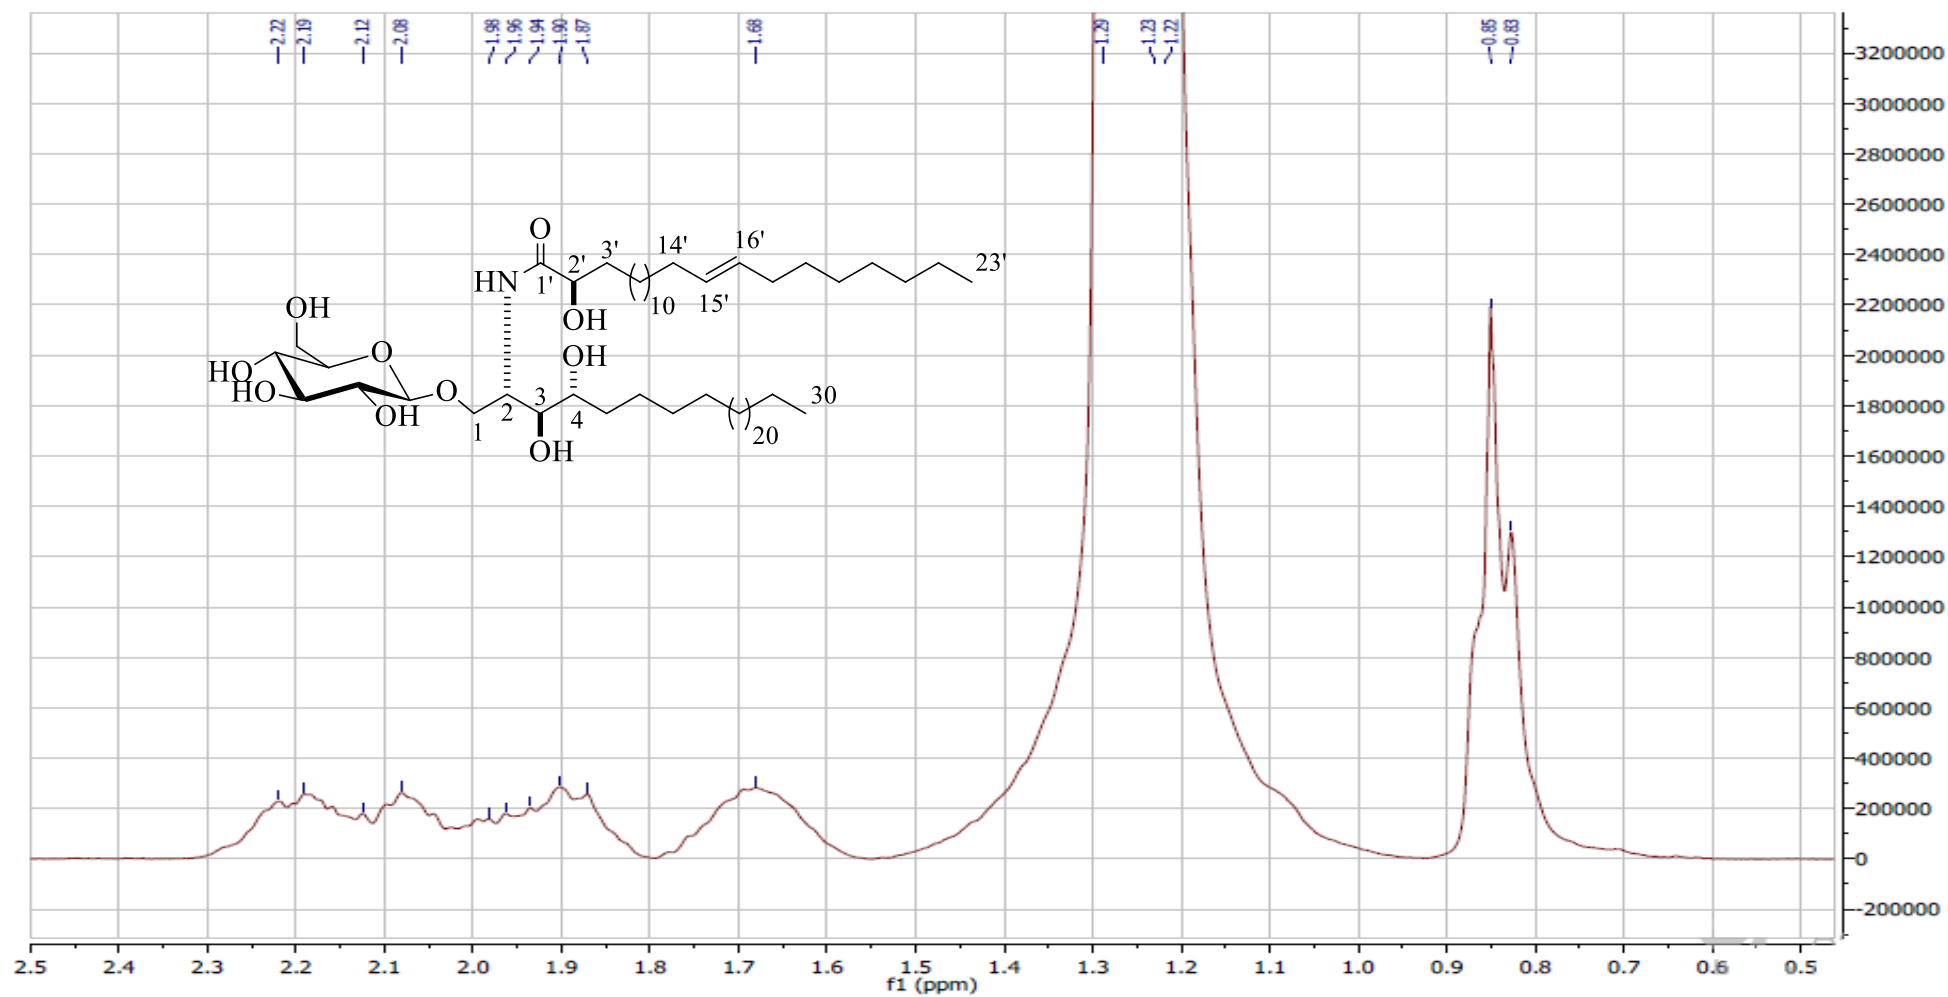

**Figure S3: Partial expansion of the  $^1\text{H-NMR}$  spectrum of compound 1 in  $(\text{C}_5\text{D}_5\text{N}, 400 \text{ MHz})$ .**

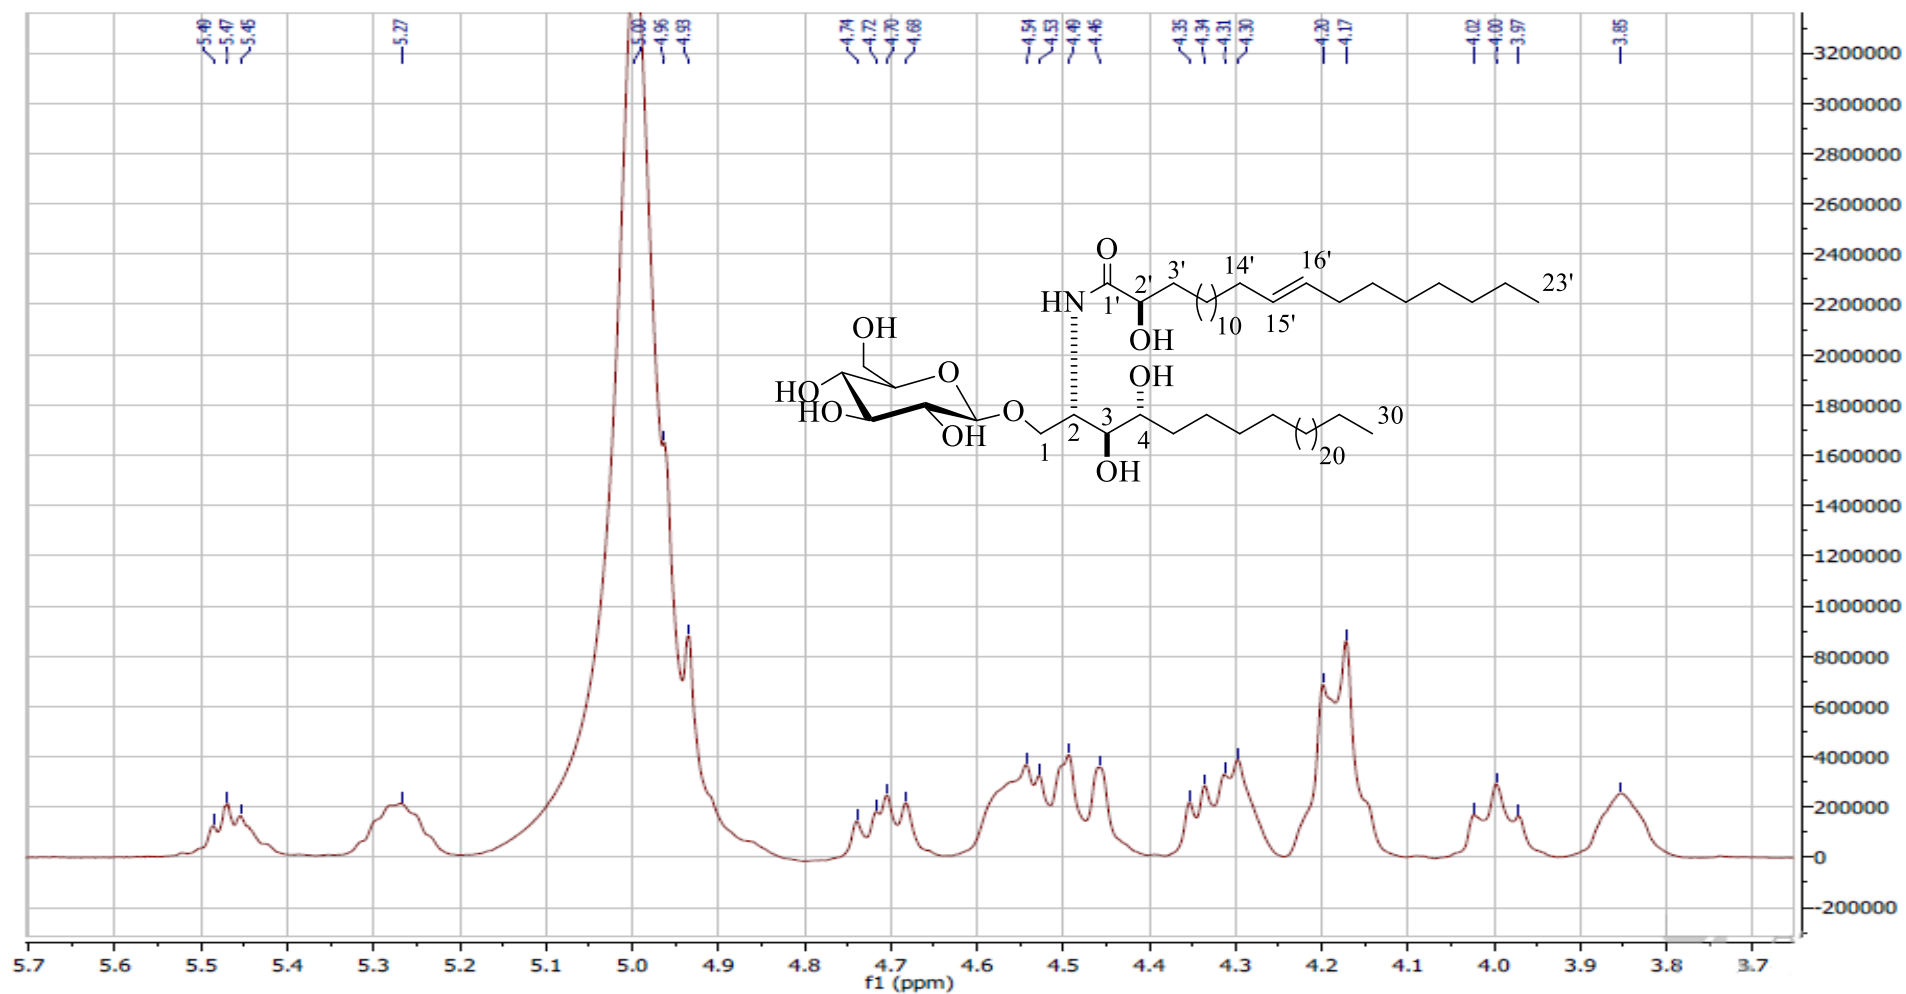

Figure S4: Partial expansion of the  $^1\text{H-NMR}$  spectrum of compound 1 in ( $\text{C}_5\text{D}_5\text{N}$ , 400 MHz).

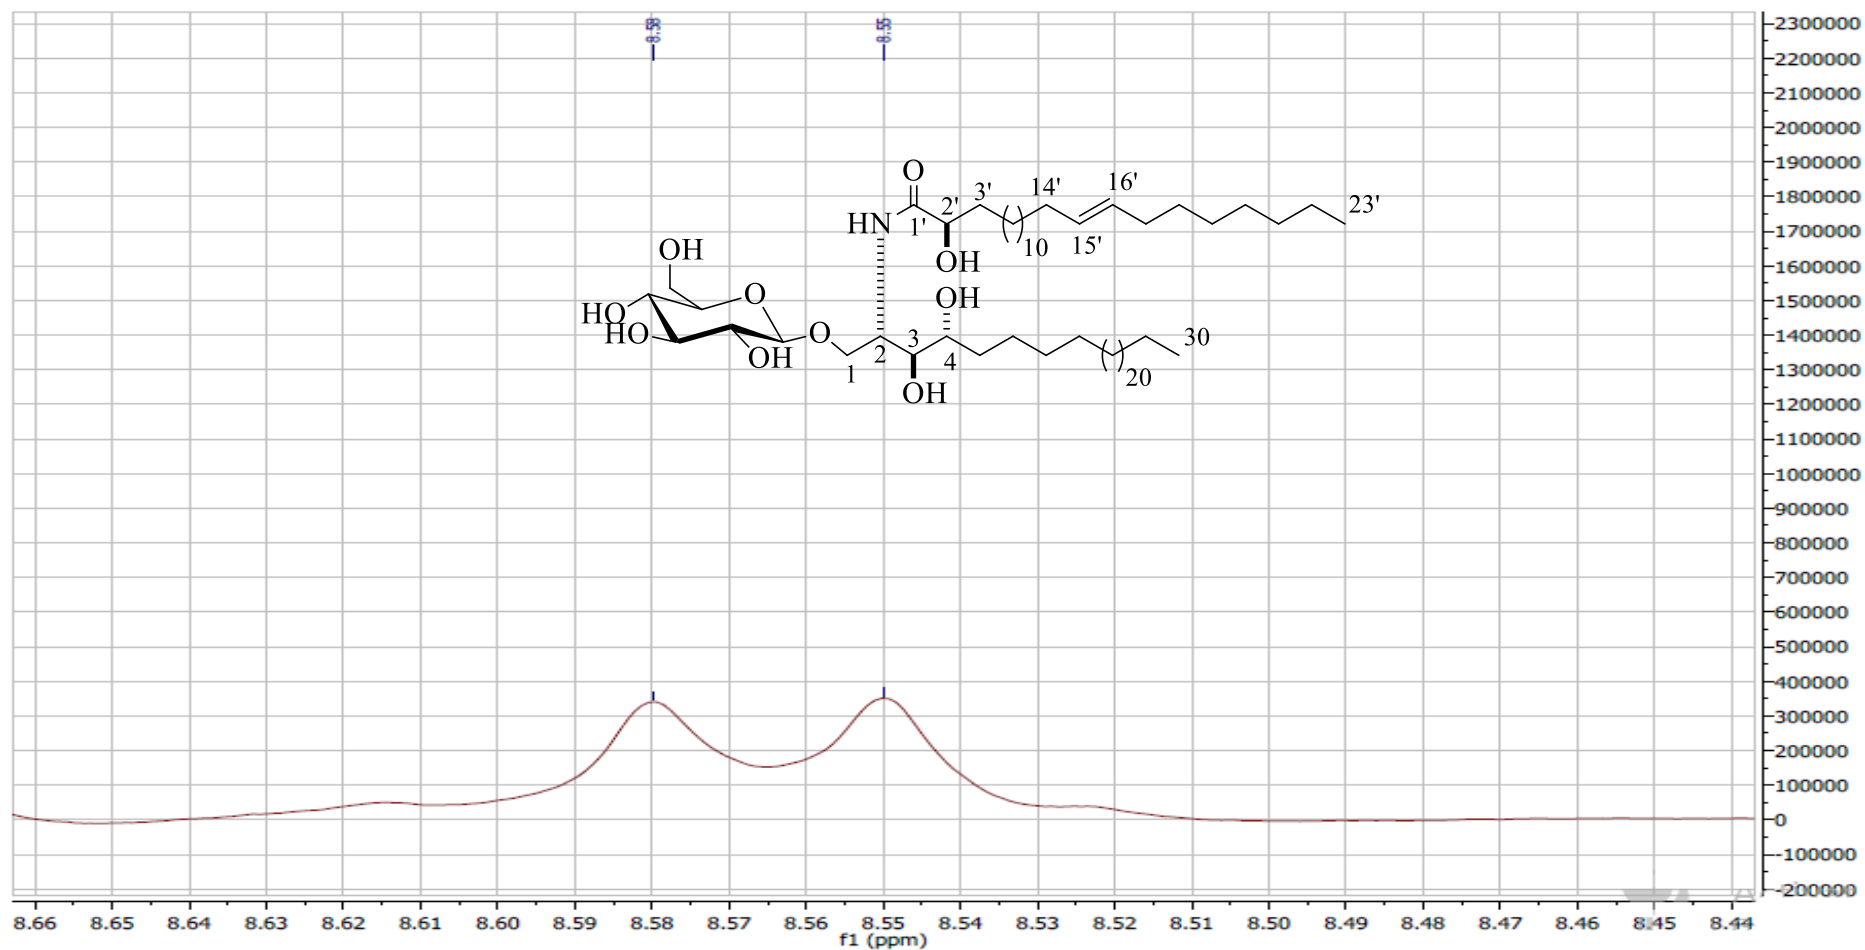

**Figure S5: Partial expansion of the <sup>1</sup>H-NMR spectrum of compound 1 in (C<sub>5</sub>D<sub>5</sub>N, 400 MHz).**



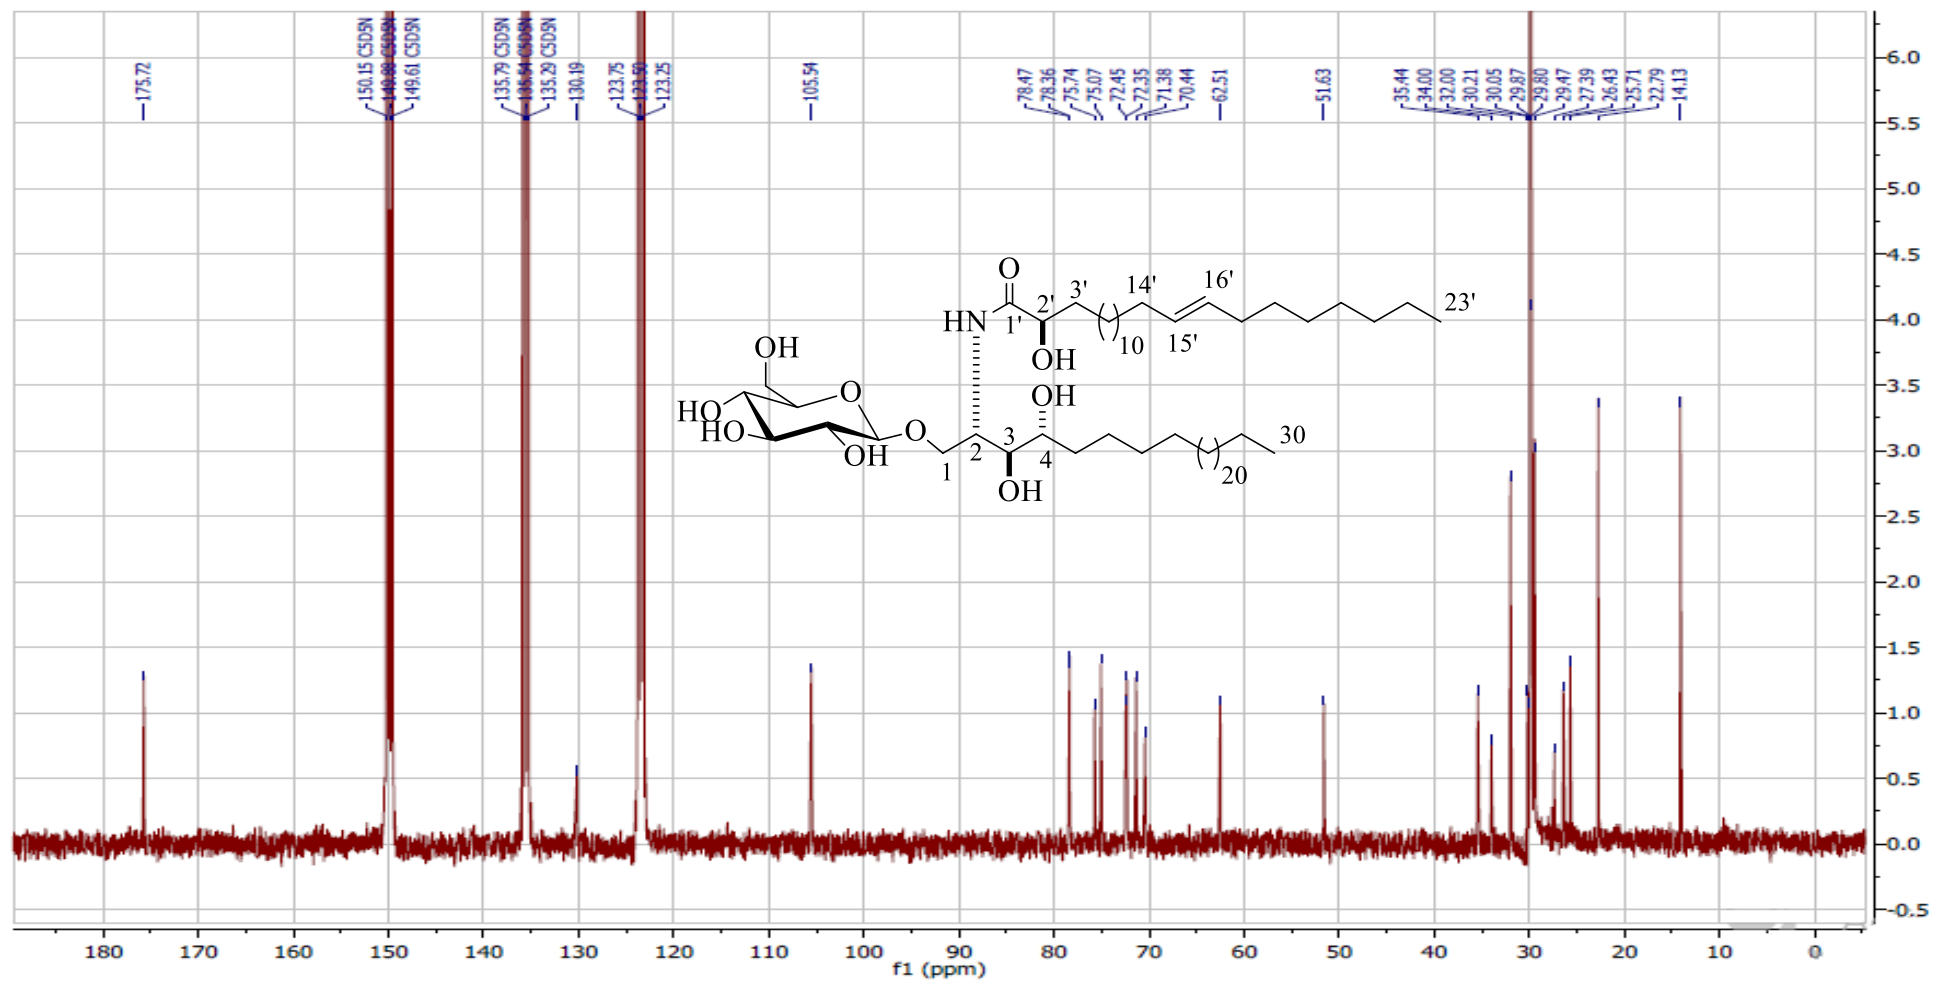

Figure S6:  $^{13}\text{C}$ -NMR spectrum of compound 1 in ( $\text{C}_5\text{D}_5\text{N}$ , 100 MHz).

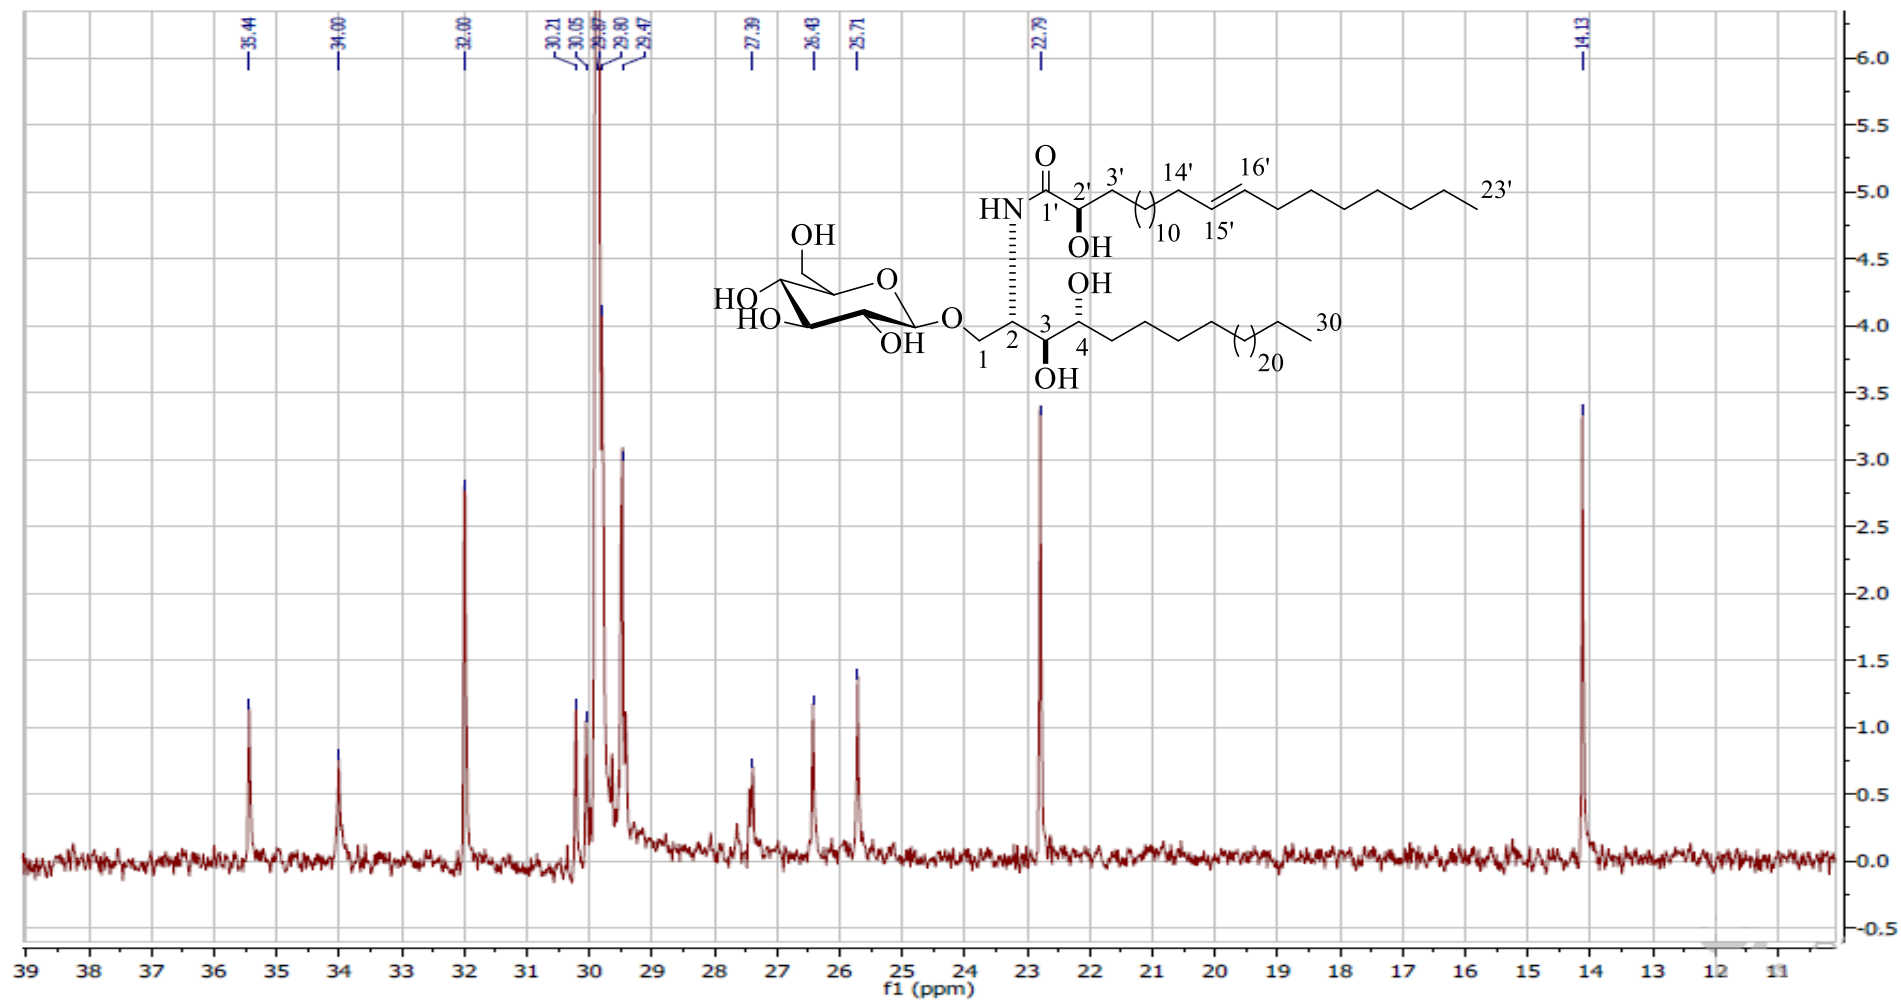

**Figure S7: Partial expansion of the  $^{13}\text{C}$ -NMR spectrum of compound 1 in ( $\text{C}_5\text{D}_5\text{N}$ , 100 MHz).**

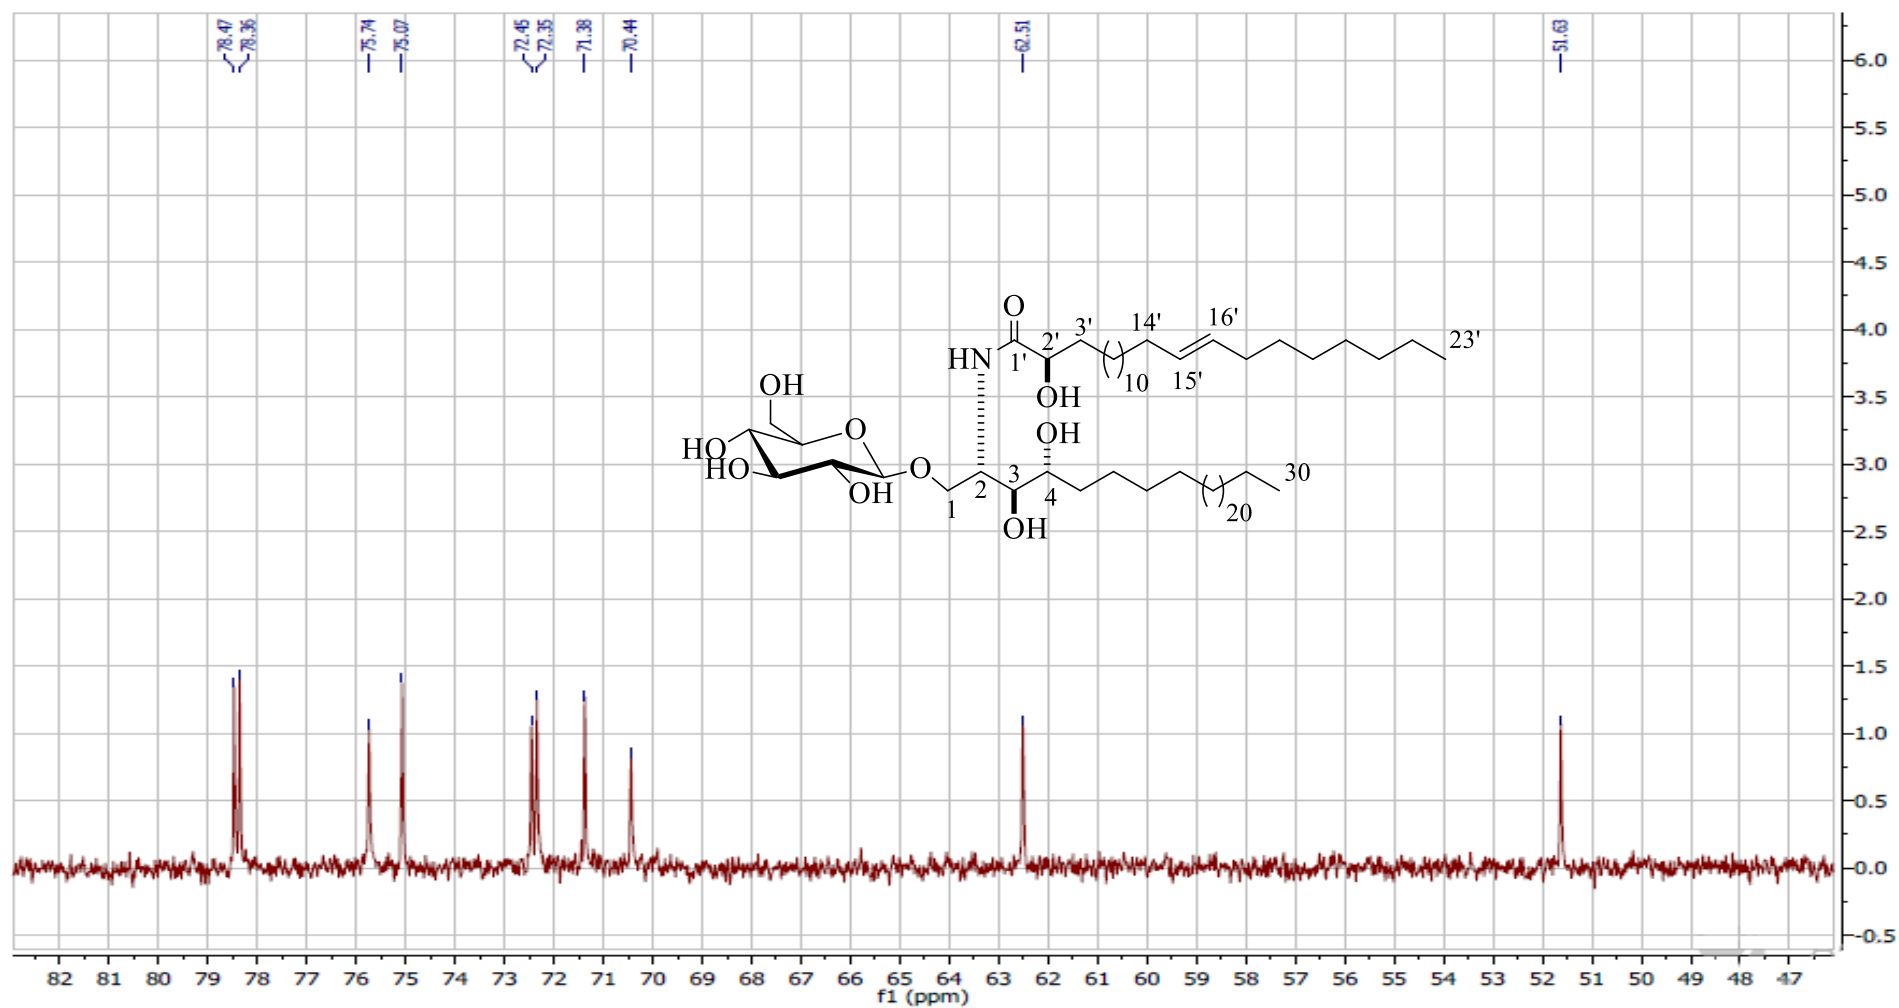

**Figure S8: Partial expansion of the  $^{13}\text{C}$ -NMR spectrum of compound 1 in ( $\text{C}_5\text{D}_5\text{N}$ , 100 MHz).**

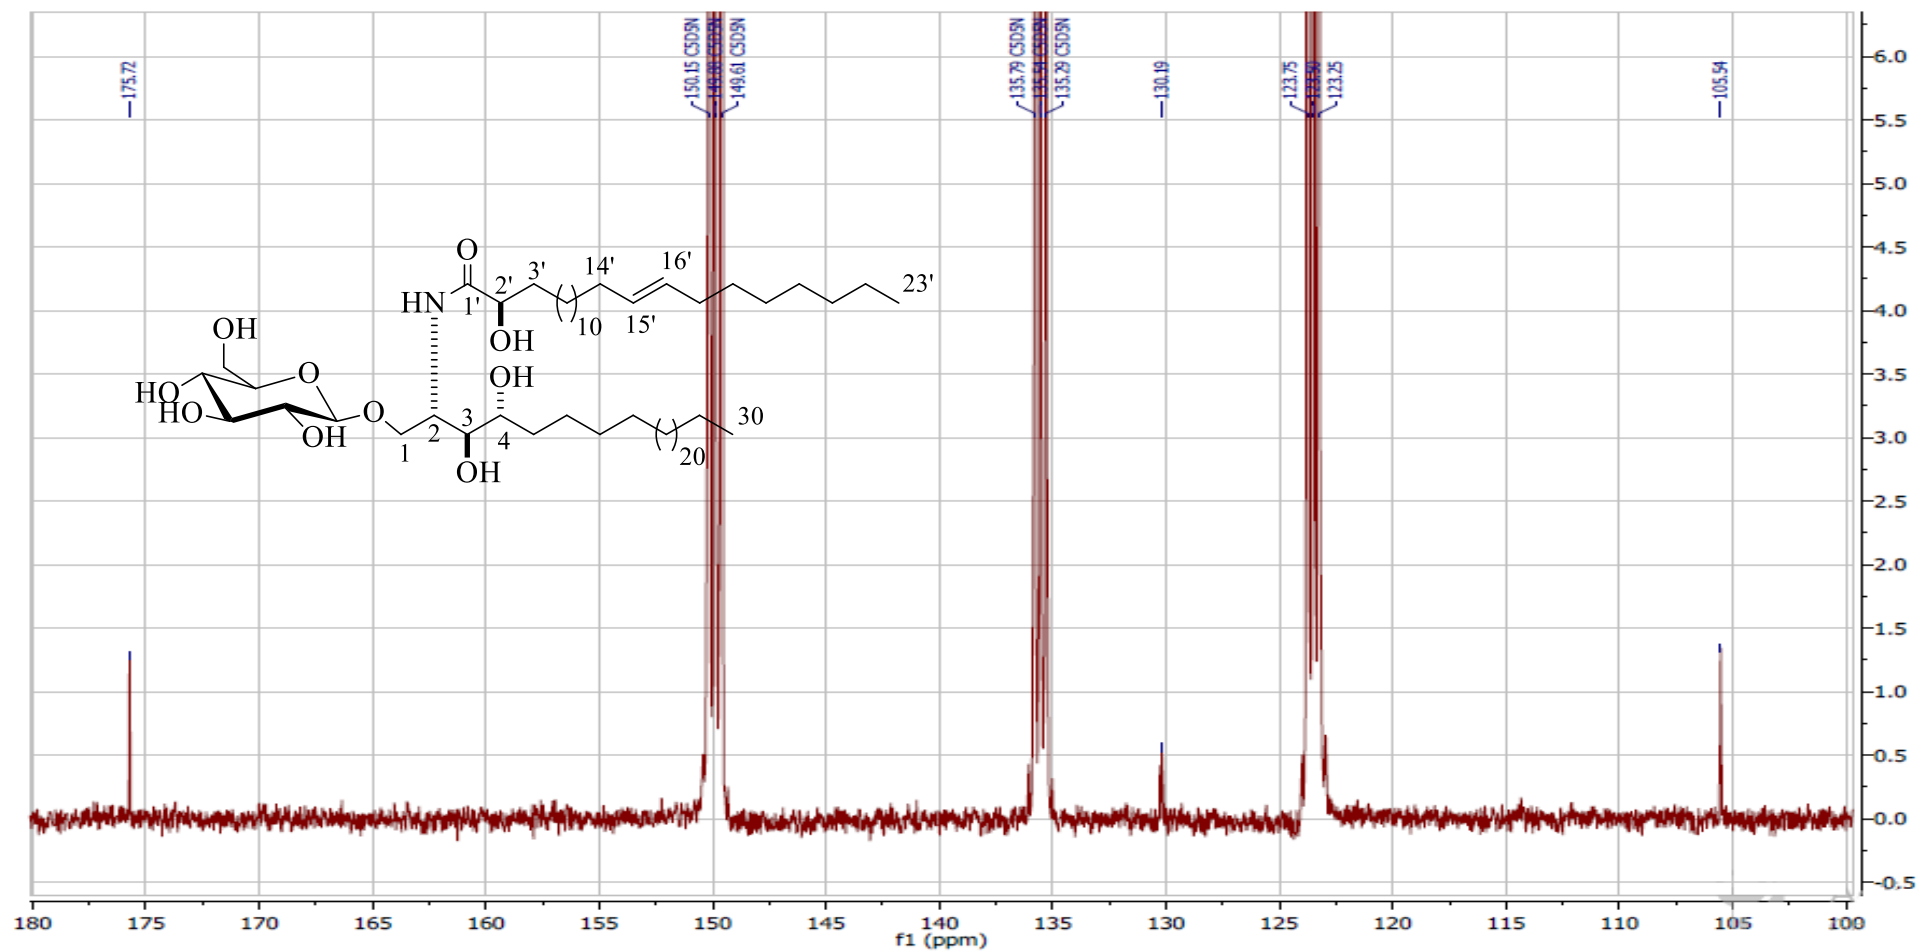

**Figure S9:** Partial expansion of the  $^{13}\text{C}$ -NMR spectrum of compound 1 in ( $\text{C}_5\text{D}_5\text{N}$ , 100 MHz).

:\FT-IR Measurements\ATR\REDA.0

07/03/2021 10:53:45

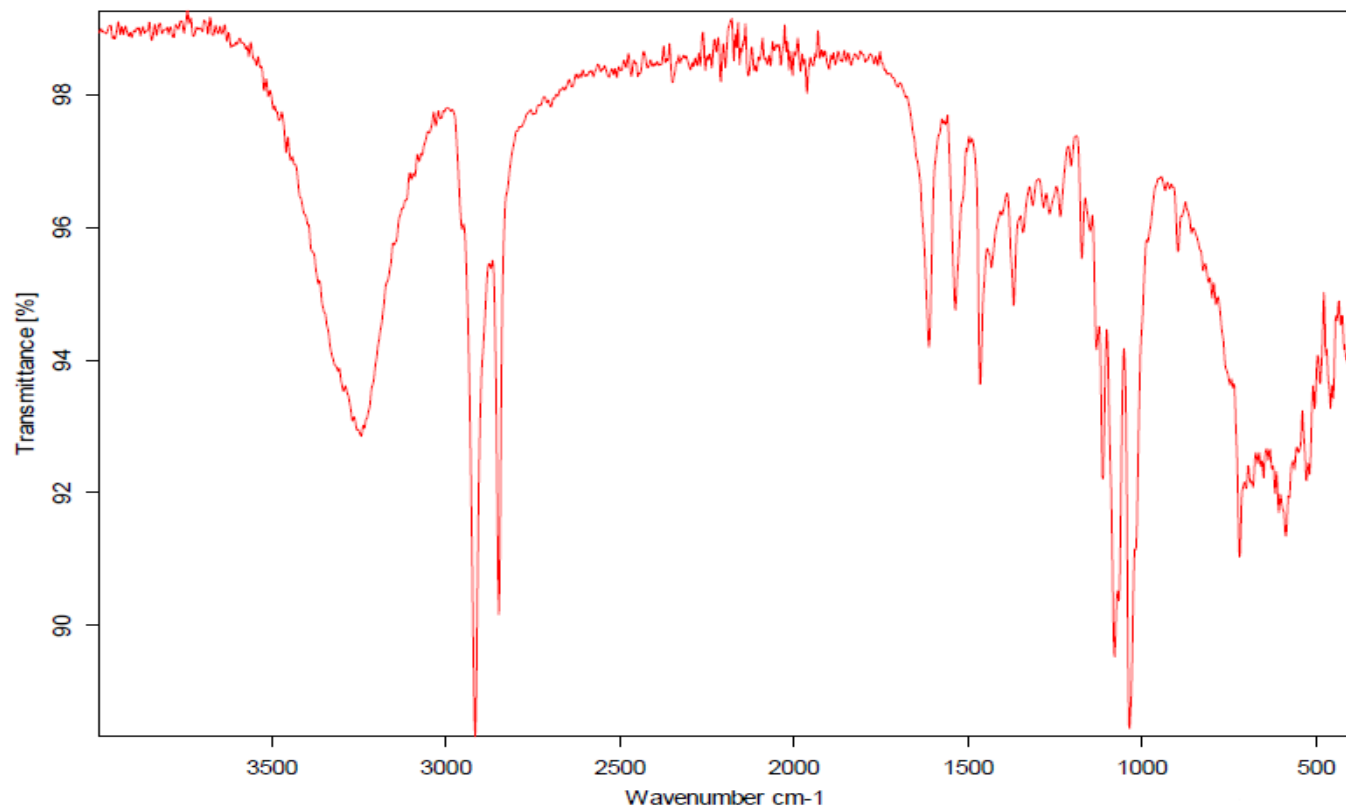

**Figure S10: IR spectrum of compound 1.**

URM2\_ESI\_Positive

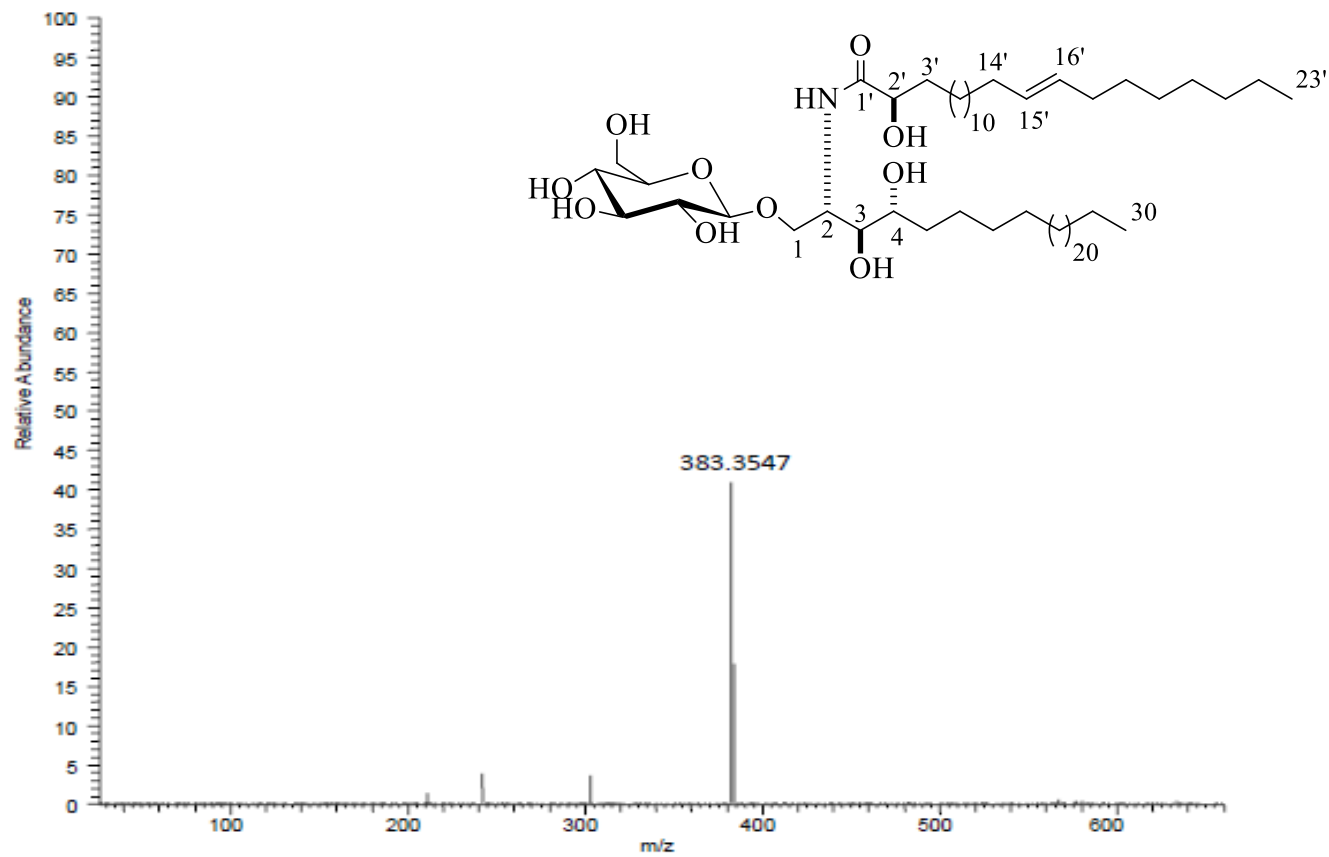

**Figure S11: HRMS of  $\alpha$ -hydroxy fatty acid methyl ester resulted from hydrolysis of compound 1**

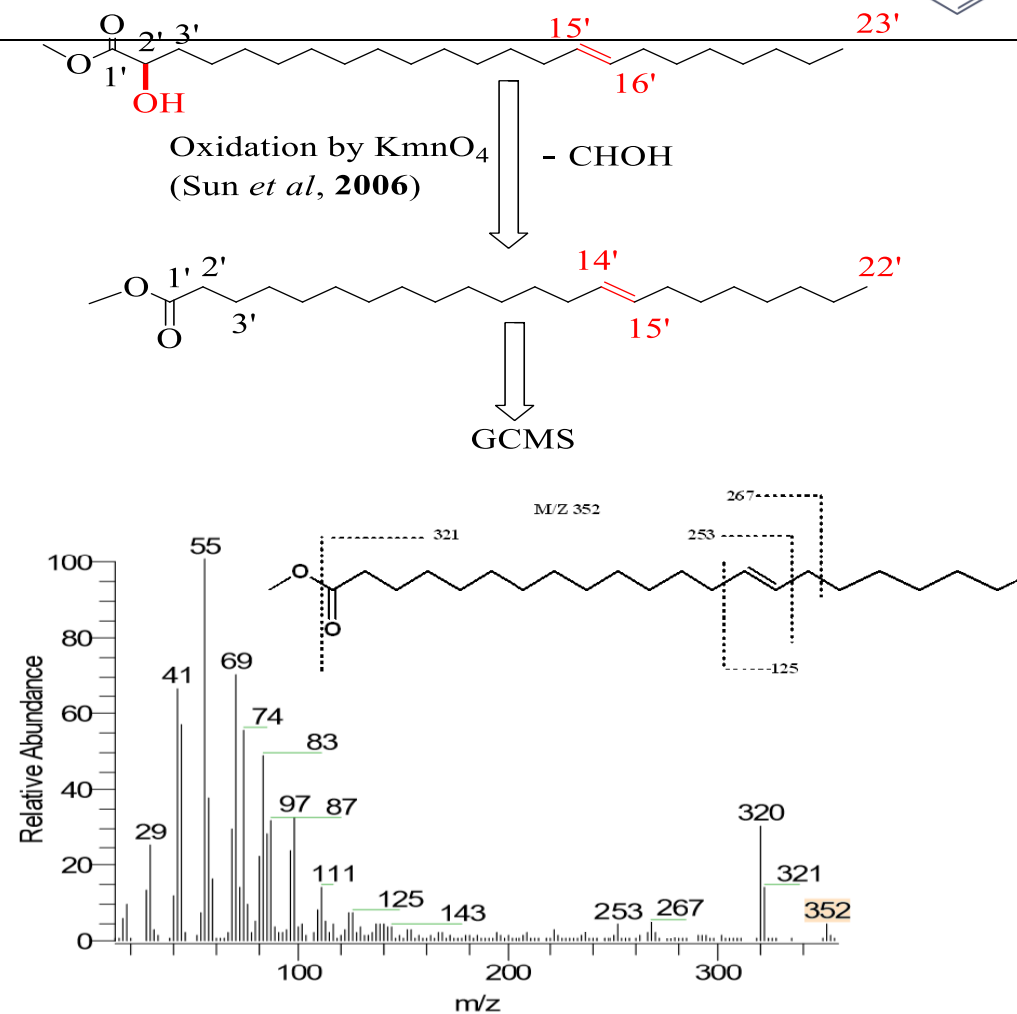

**Figure S12: GC-MS analysis of fatty acids methyl ester carried out after oxidation of  $\alpha$ -hydroxy fatty acid methyl ester (Compound 1)**

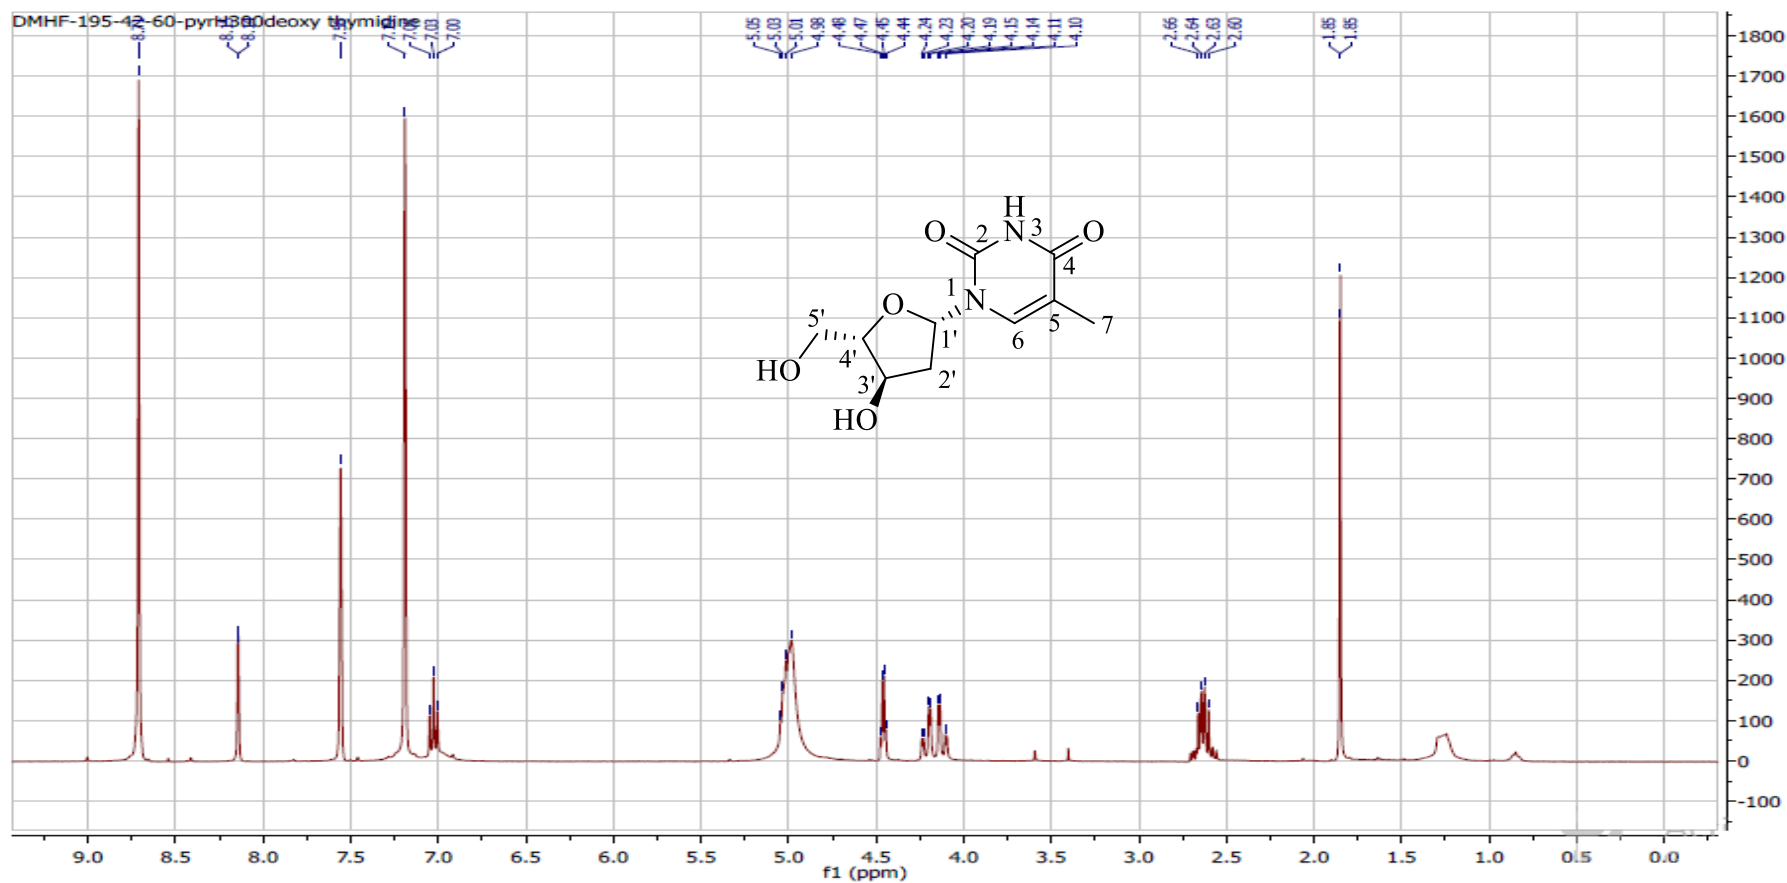



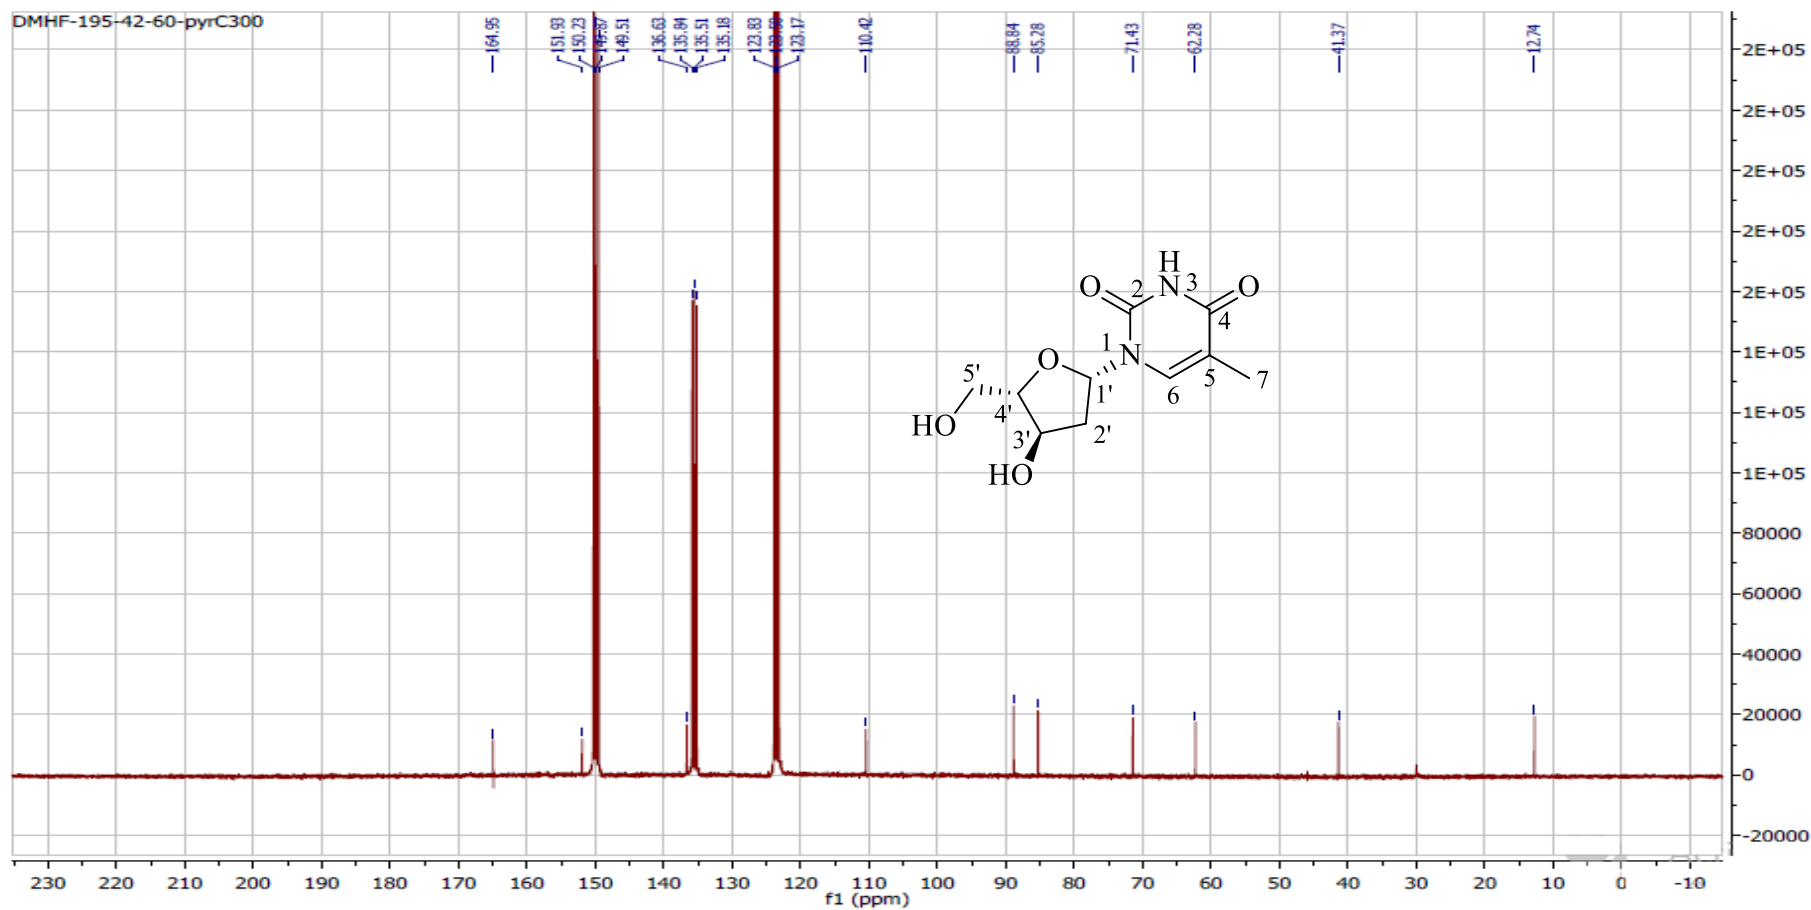

Figure S14:  $^{13}\text{C}$ -NMR spectrum of compound 2 in ( $\text{C}_5\text{D}_5\text{N}$ , 100 MHz).

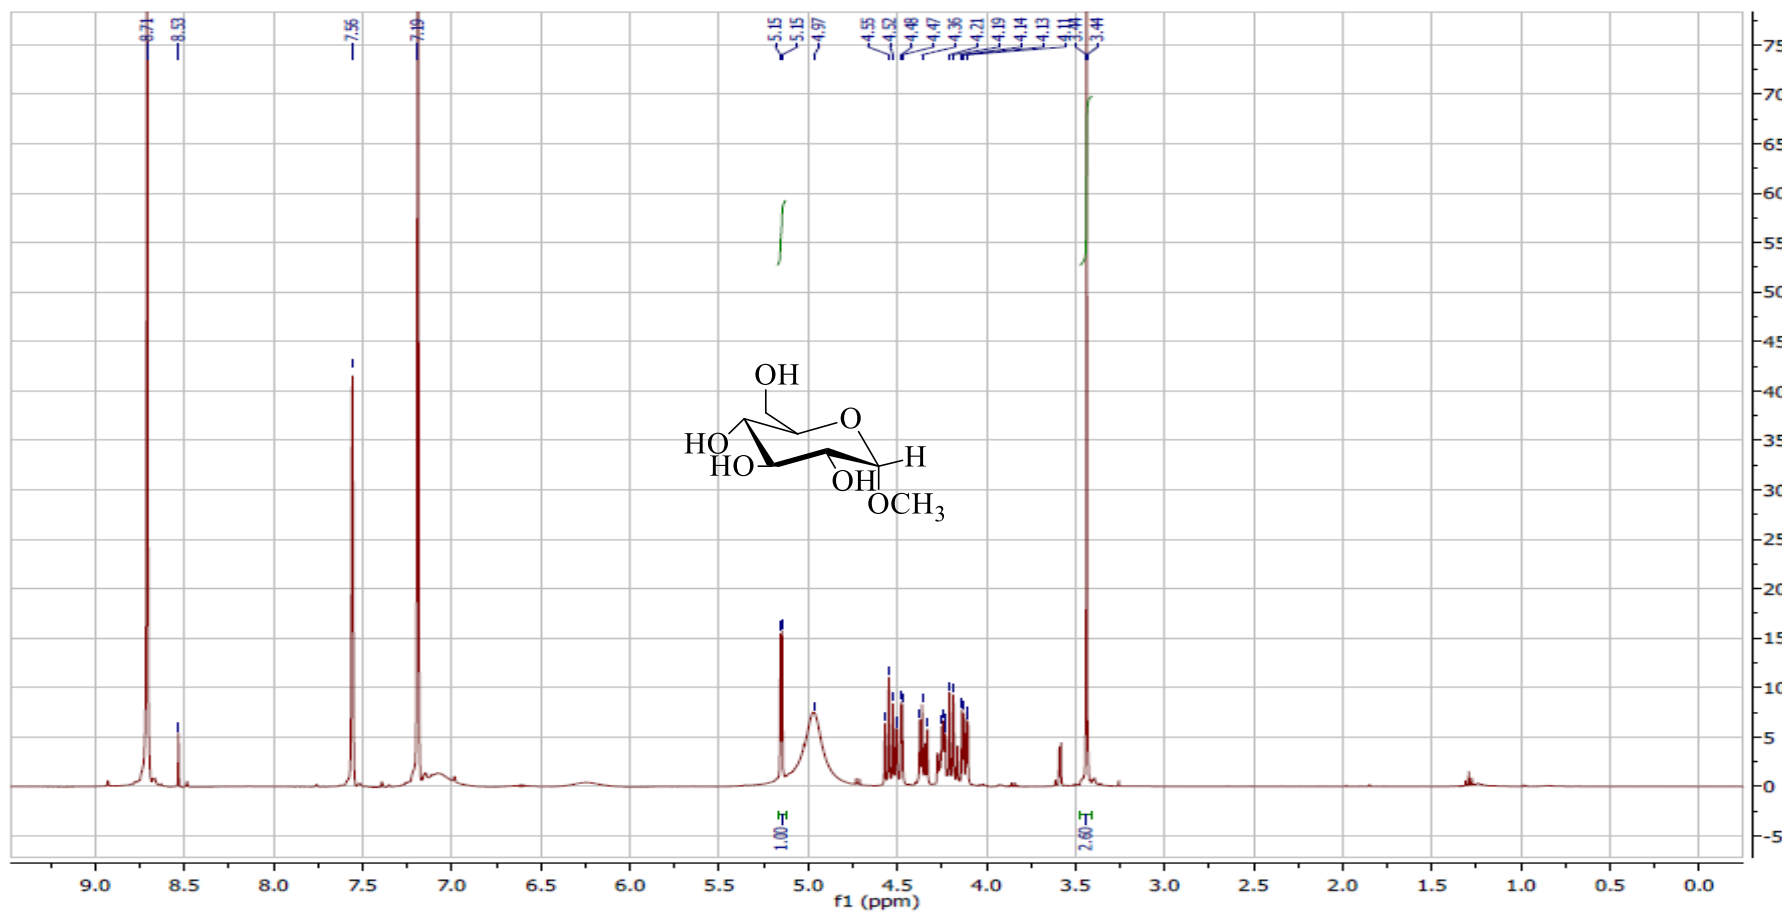

Figure S15: <sup>1</sup>H -NMR spectrum of Compound 3 in (C<sub>5</sub>D<sub>5</sub>N, 400 MHz).

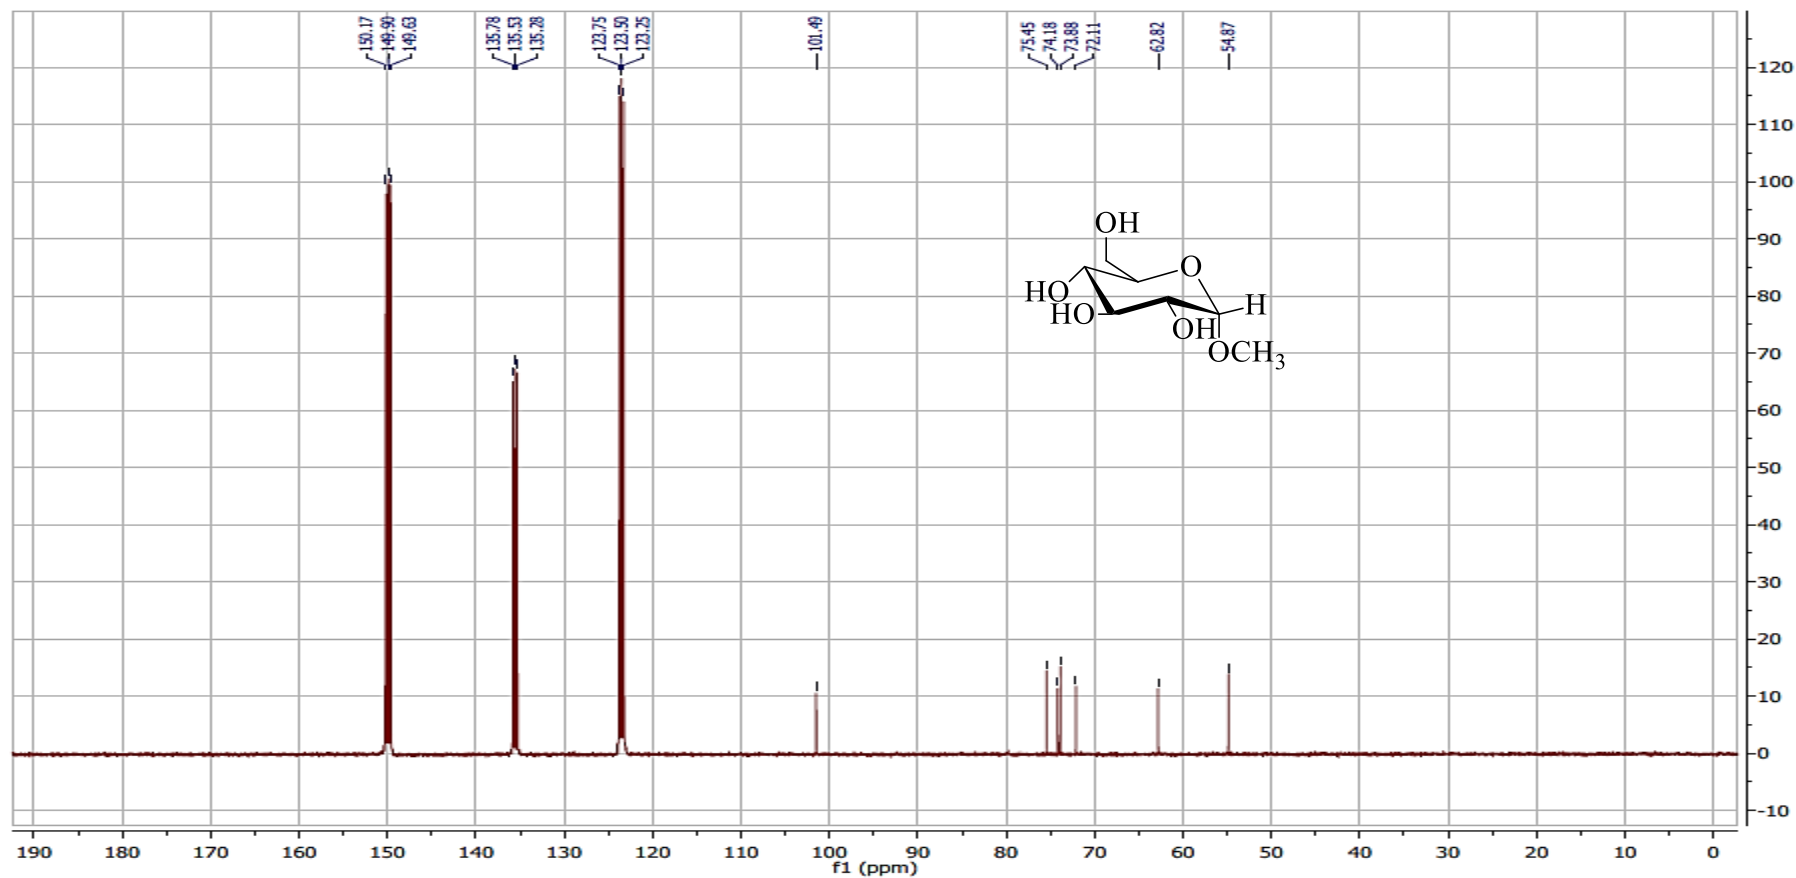

Figure S16:  $^{13}\text{C}$ -NMR spectrum of Compound 3 ( $\text{C}_5\text{D}_5\text{N}$ , 100 MHz).

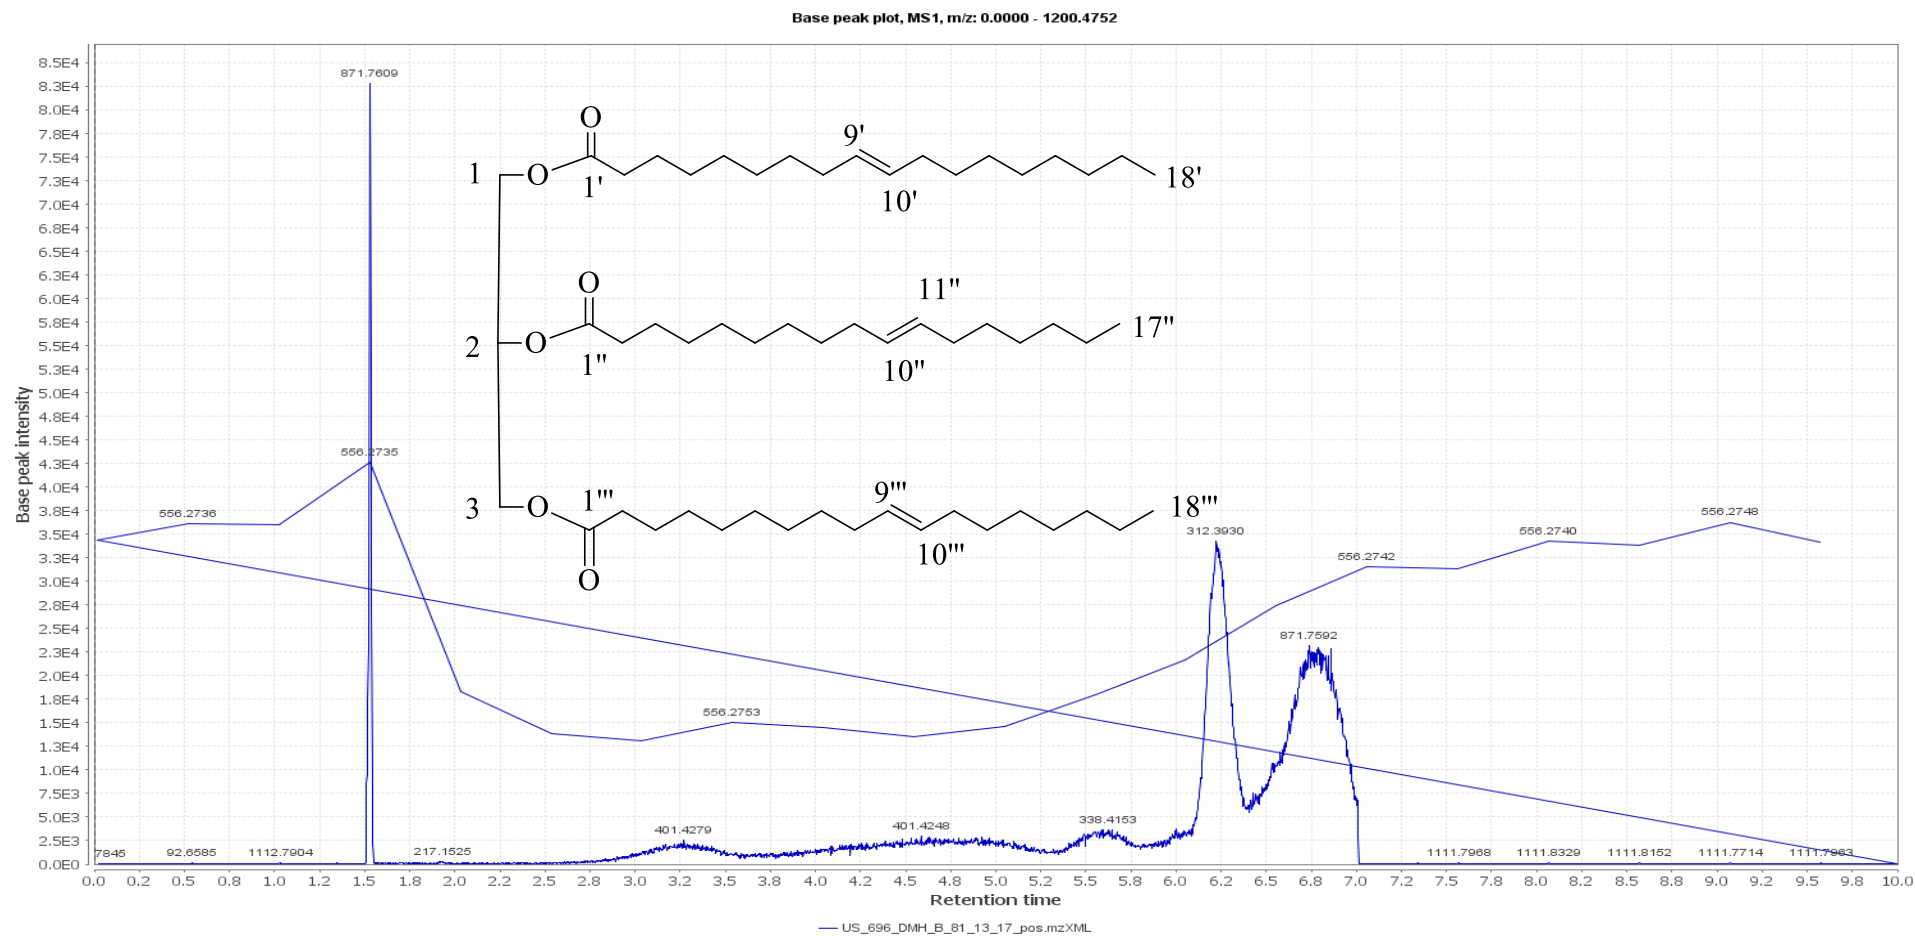

**Figure S17: HRMS of Compound 4 (M+H)<sup>+</sup>**

E:\FT-IR Measurements\ATR\OIL.0

07/03/2021 11:20:08

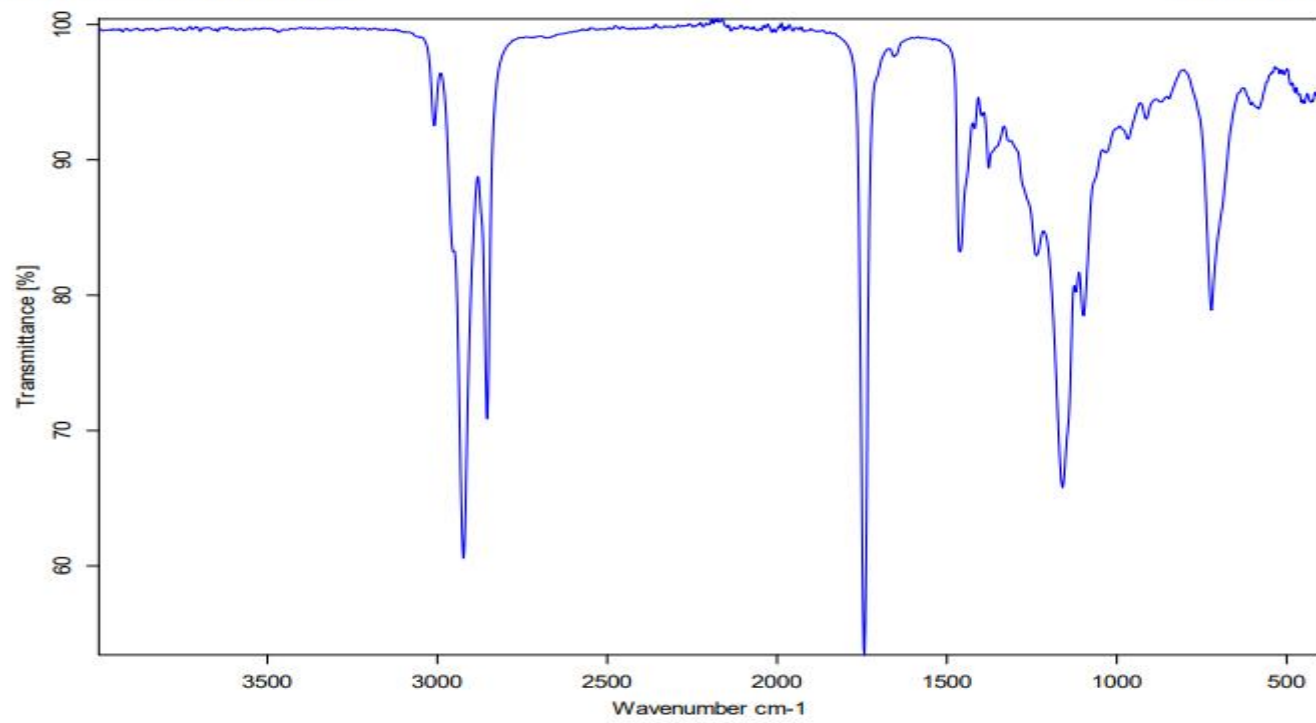

Page 1 of 1

Figure 16



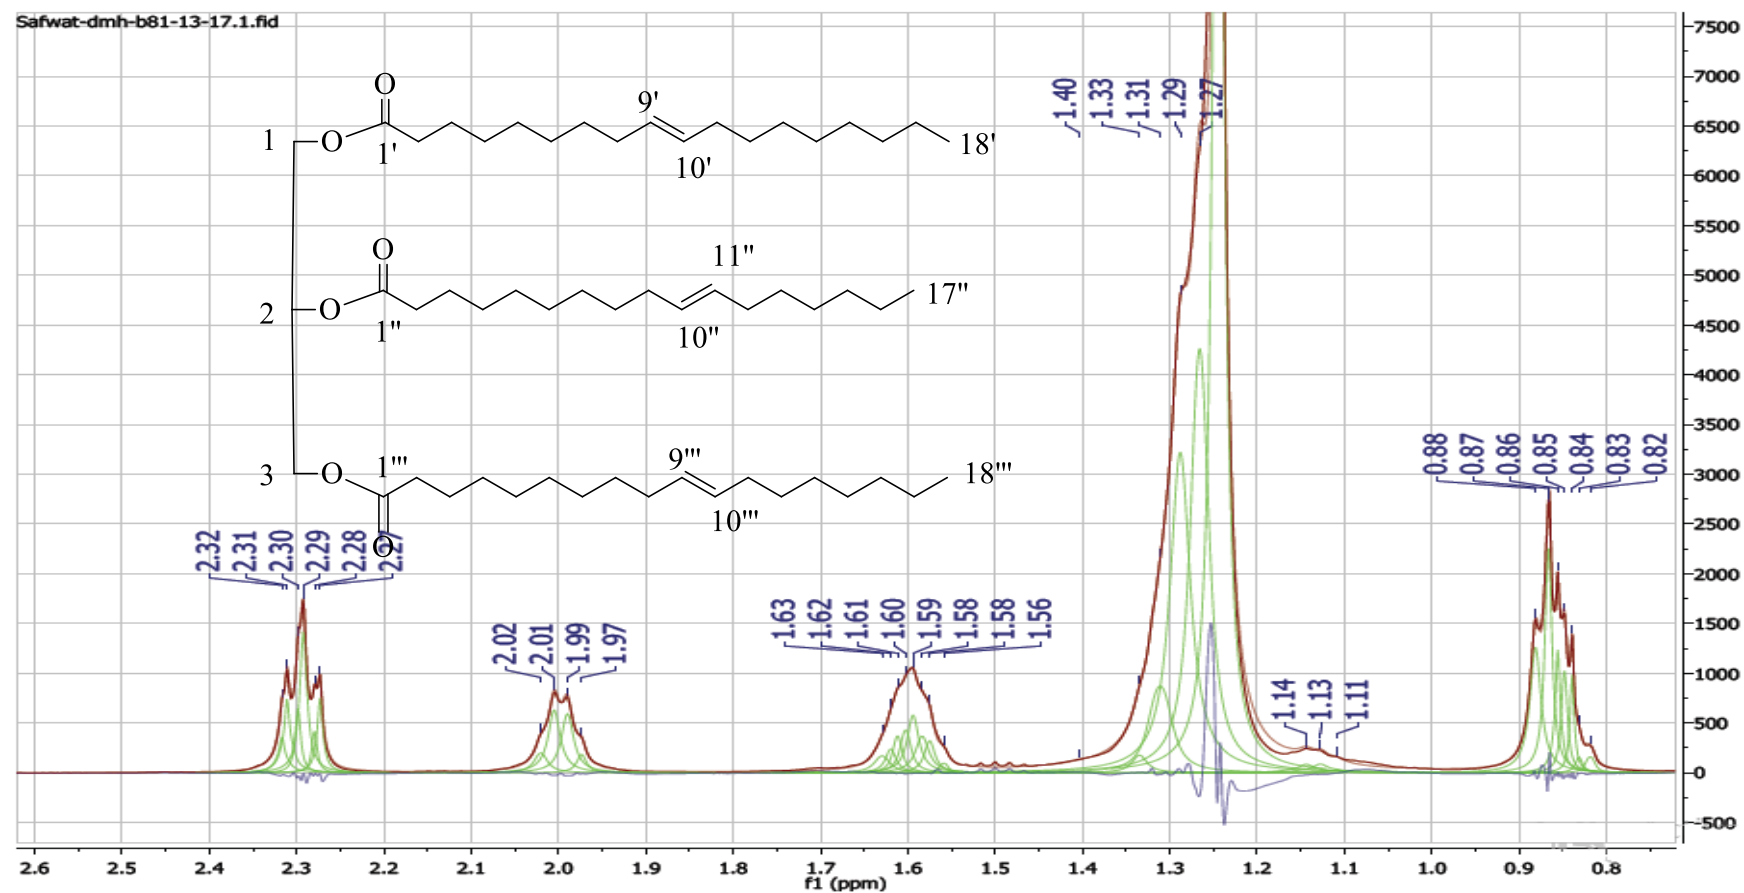

Figure S20: Partial expansions of the <sup>1</sup>H-NMR spectrum of compound 4 in (CDCl<sub>3</sub>, 400 MHz)

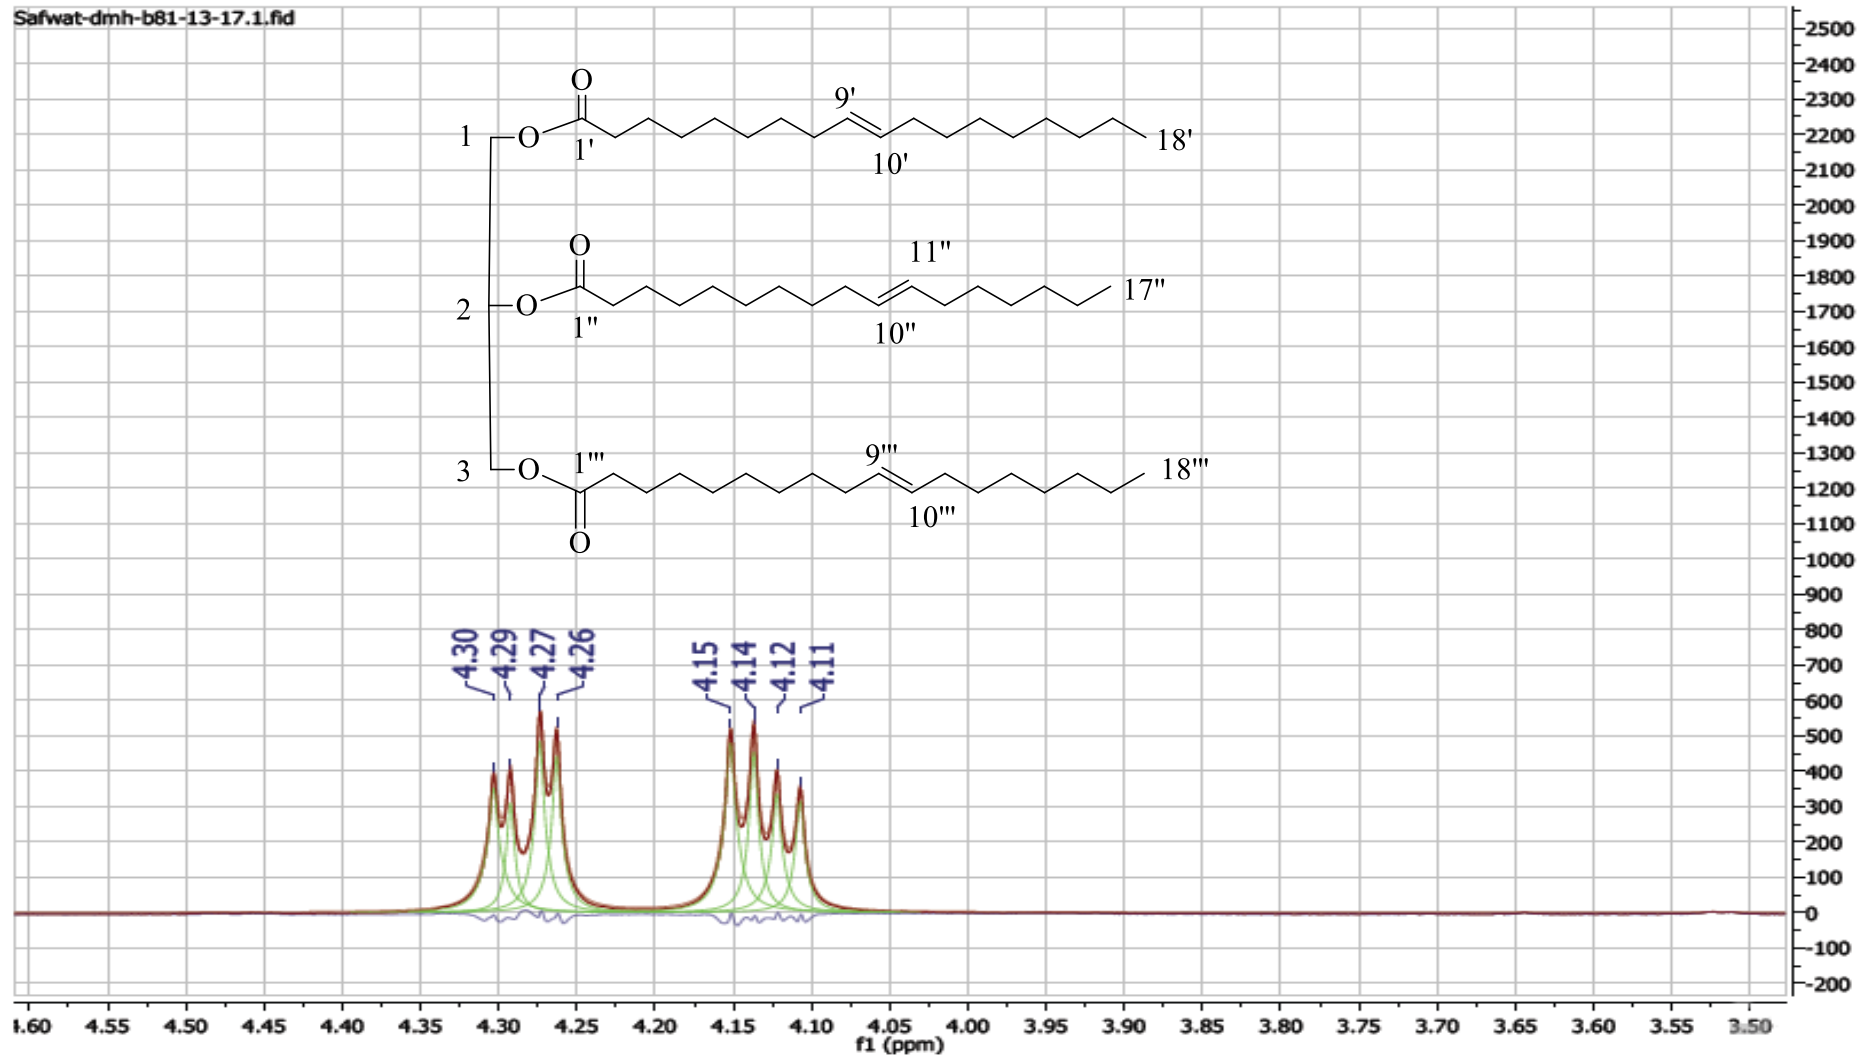

Figure S21: Partial expansions of the <sup>1</sup>H-NMR spectrum of compound 4 in (CDCl<sub>3</sub>, 400 MHz)



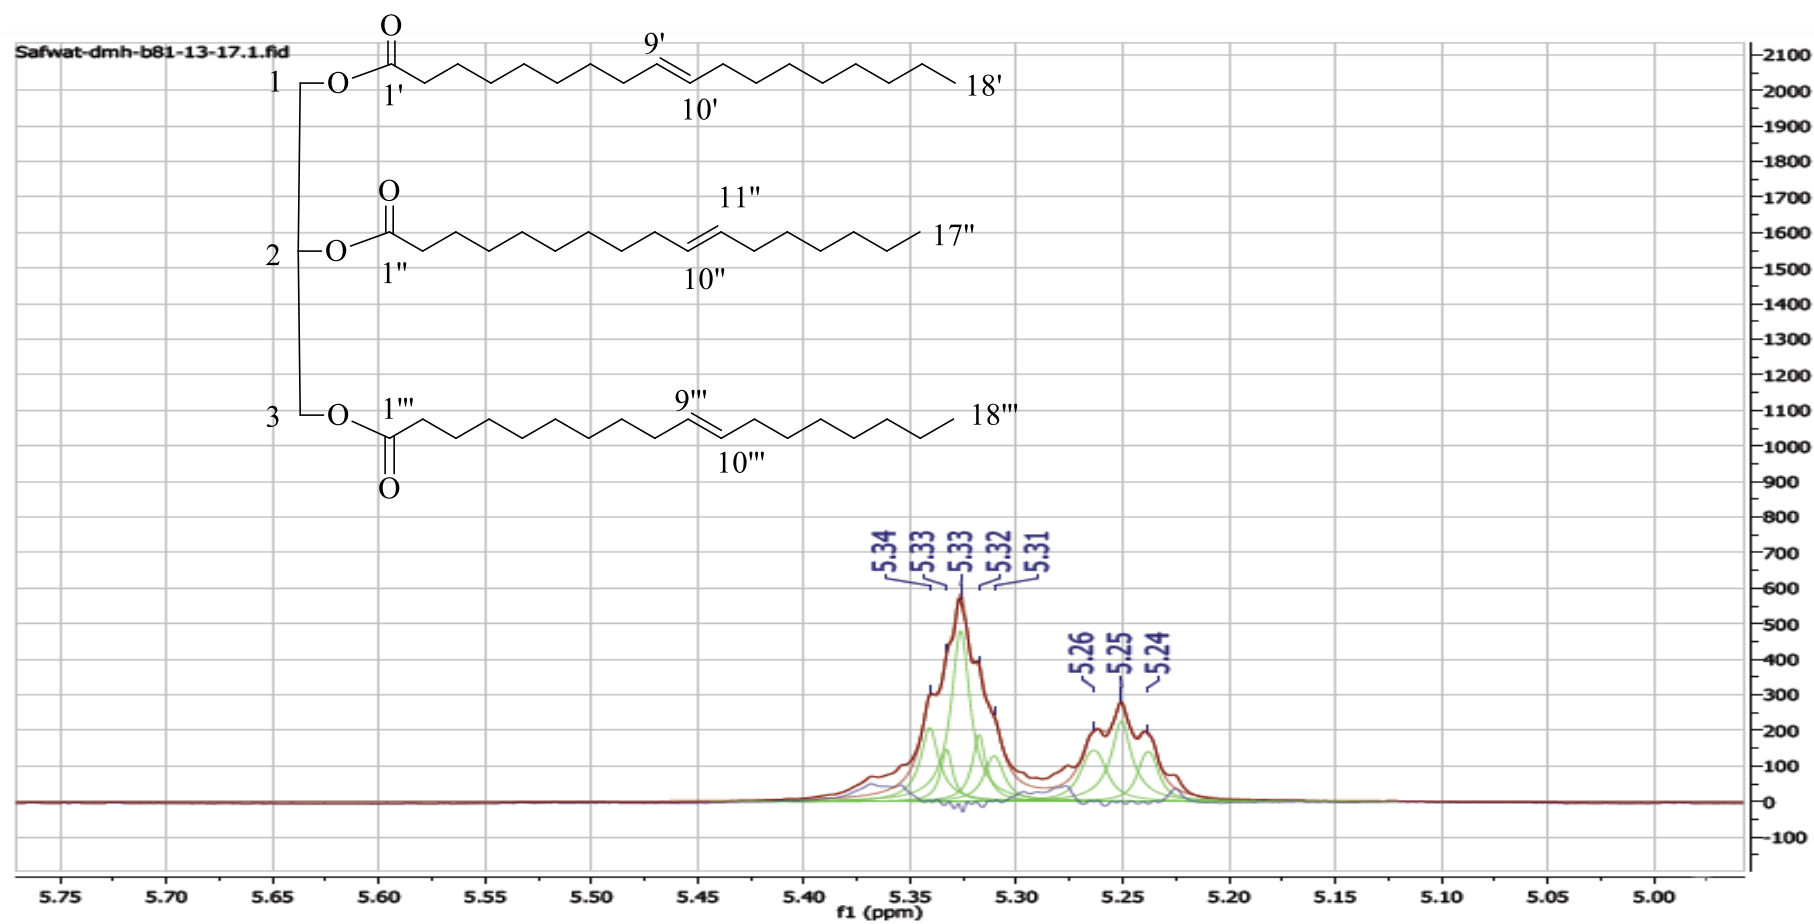

Figure S22: Partial expansions of the <sup>1</sup>H-NMR spectrum of compound 4 in (CDCl<sub>3</sub>, 400 MHz)

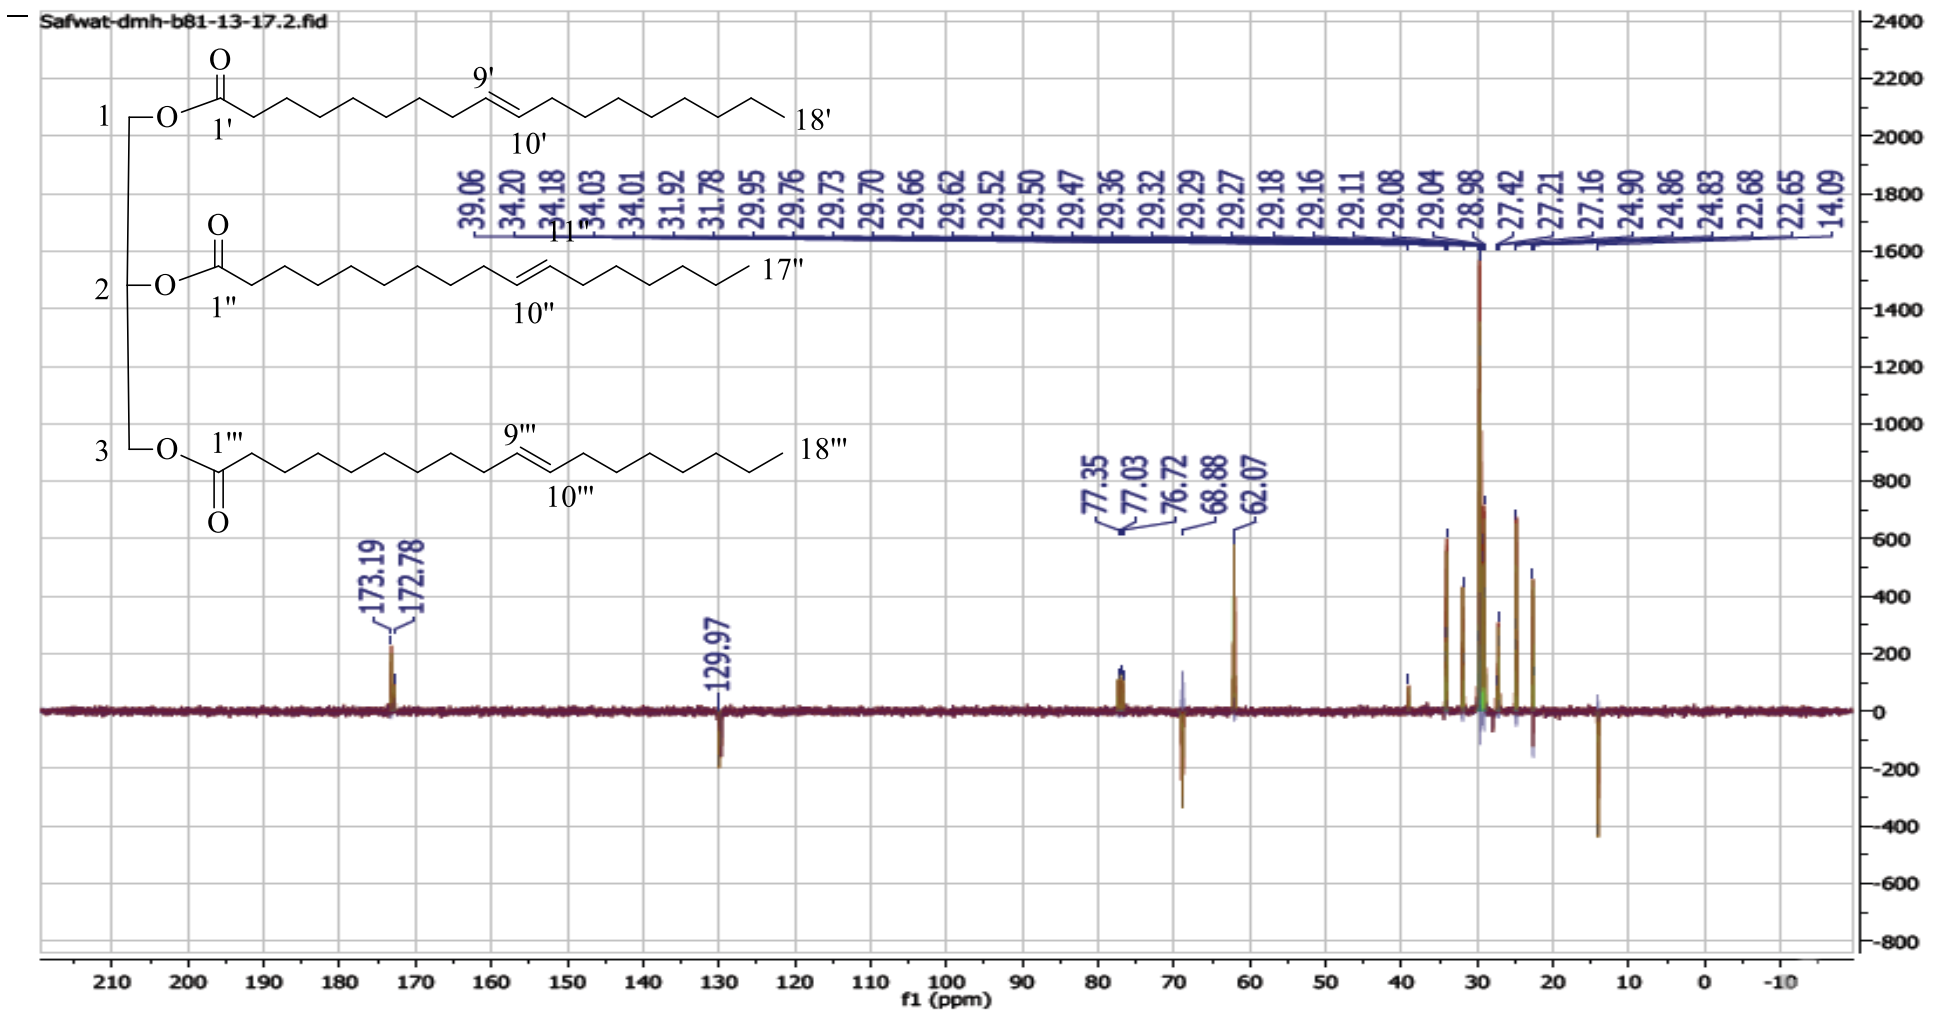

Figure S23:  $^{13}\text{C}$ -NMR spectrum of compound 4 in ( $\text{CDCl}_3$ , 400 MHz).

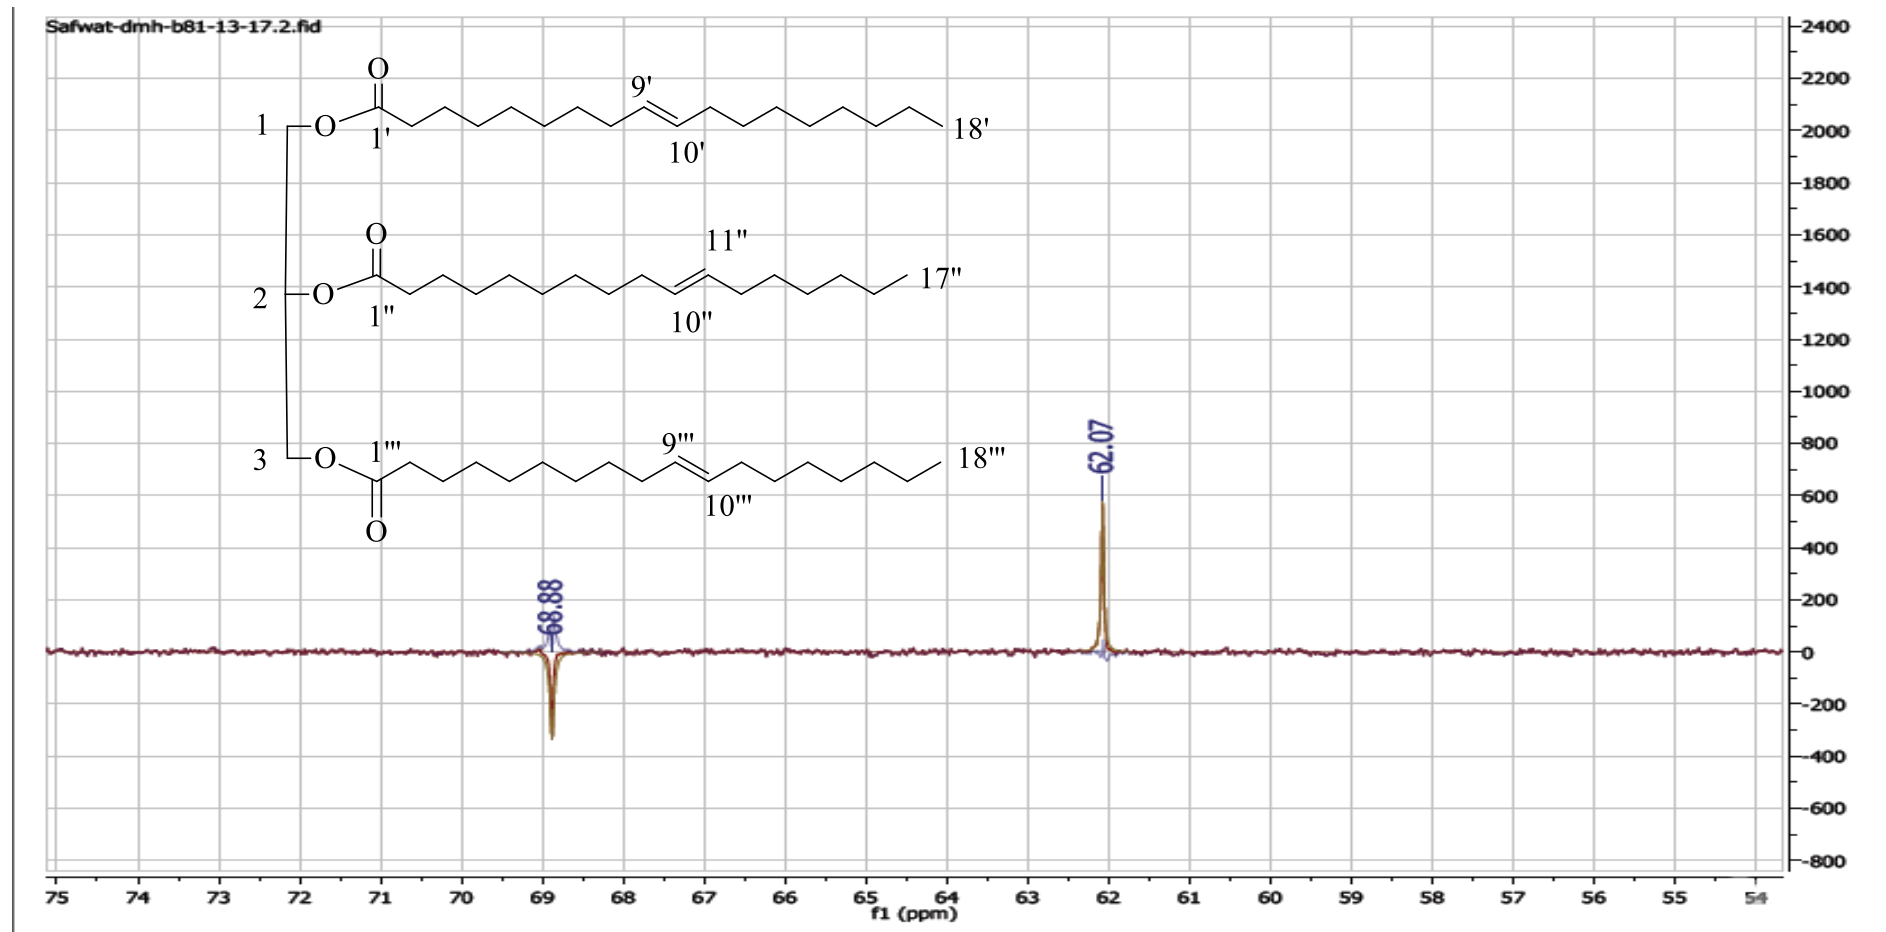

Figure S24: Partial expansion  $^{13}\text{C}$ -NMR spectrum of compound 4 in ( $\text{CDCl}_3$ , 400 MHz).

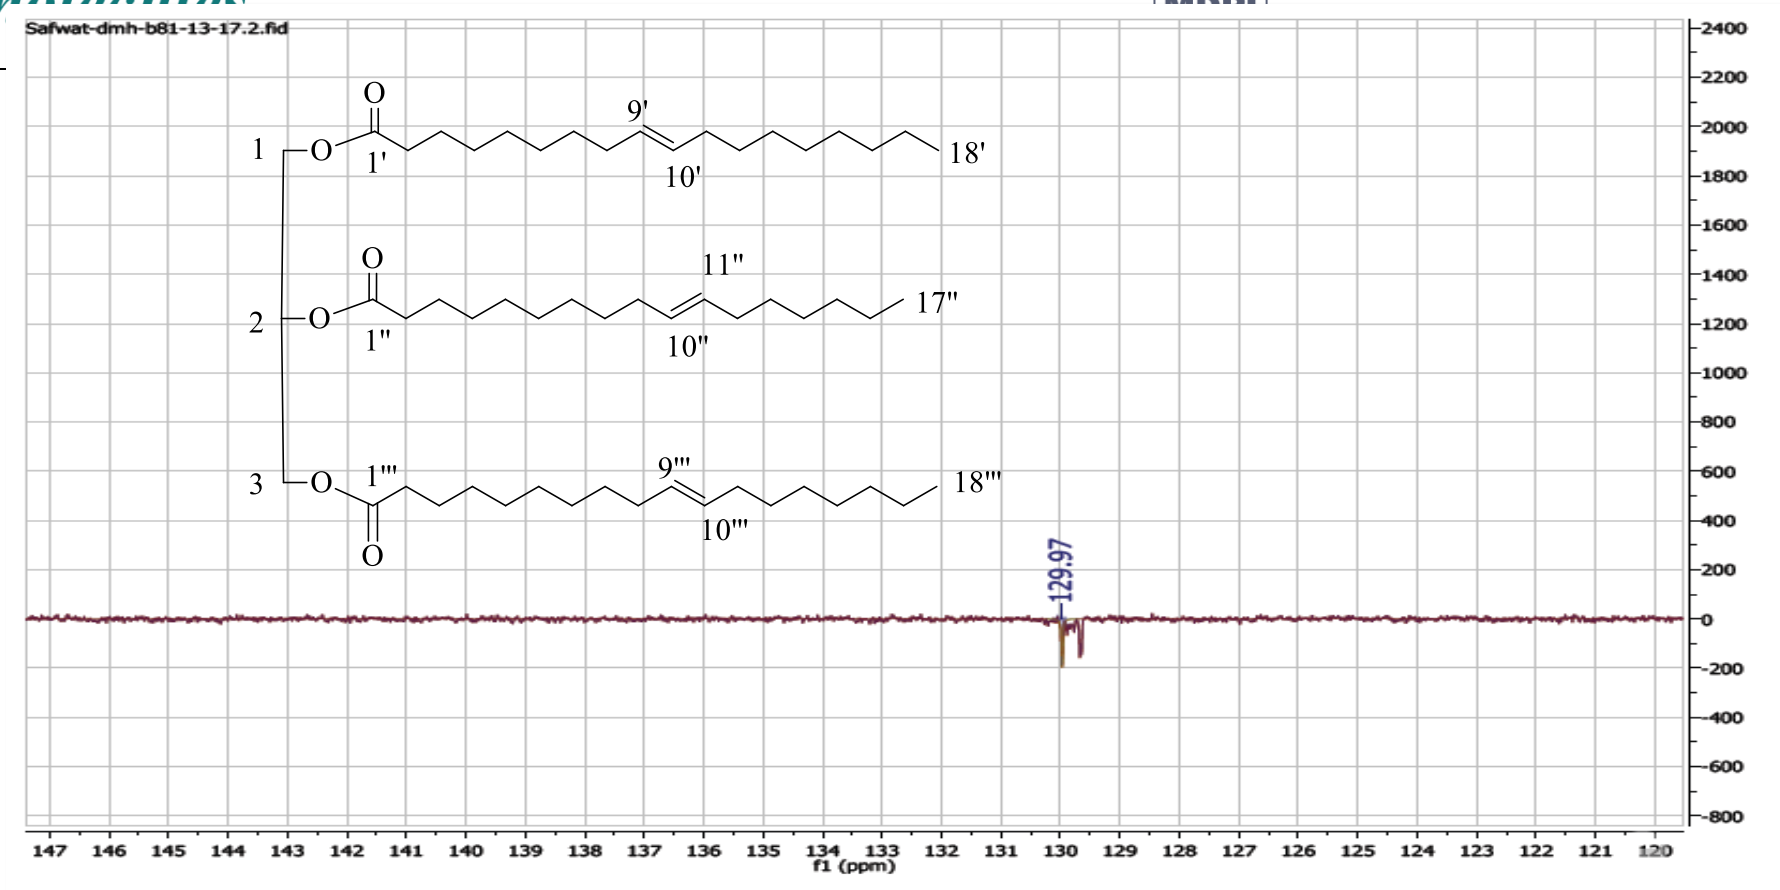

Figure S25: Partial expansion <sup>13</sup>C-NMR spectrum of compound 4 in (CDCl<sub>3</sub>, 400 MHz).

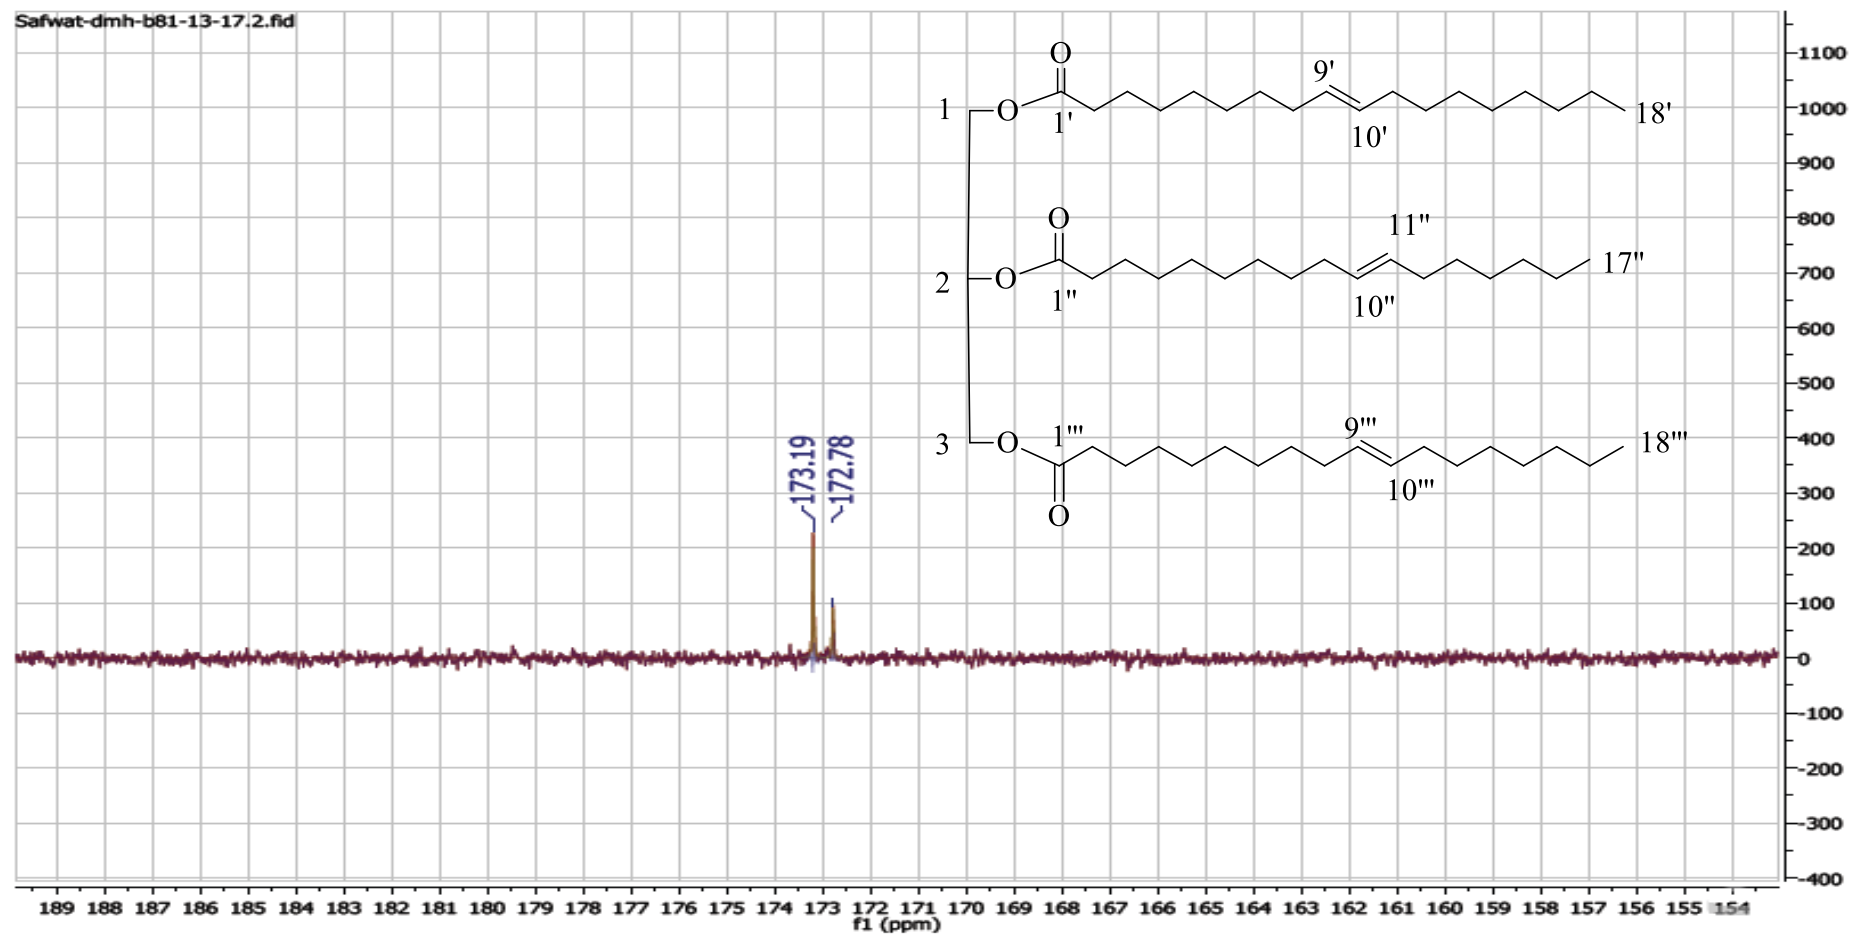

Figure S26: Partial expansion  $^{13}\text{C}$ -NMR spectrum of compound 4 in ( $\text{CDCl}_3$ , 400 MHz).

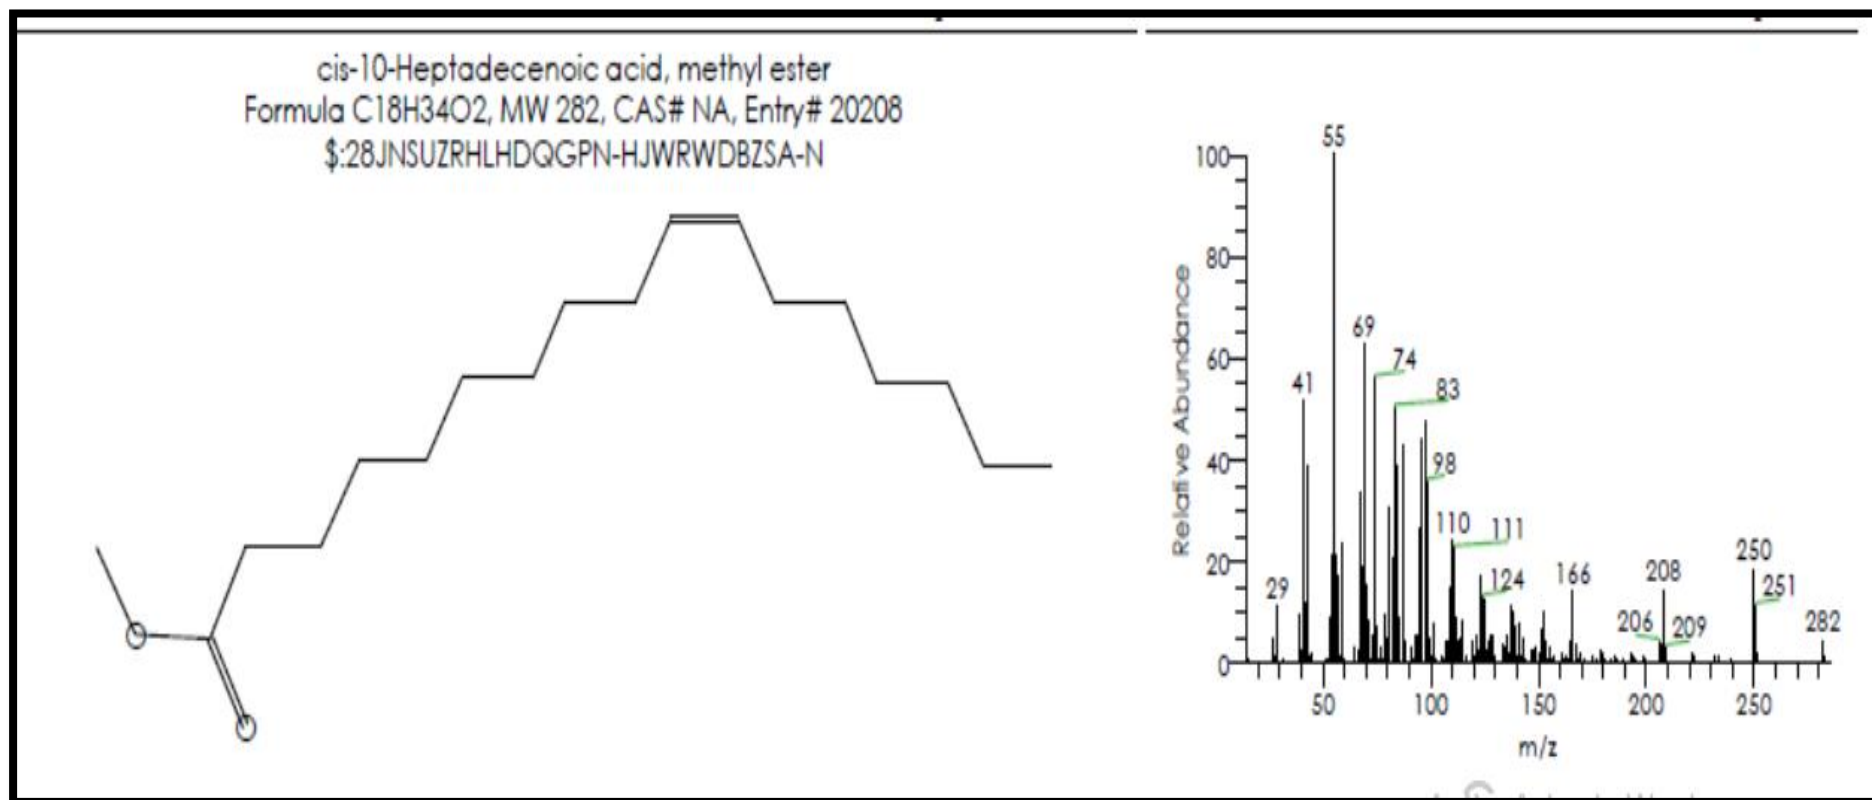

**Figure S27: MS spectrum for 10-Heptadecenoic acid (z)- methyl ester.**

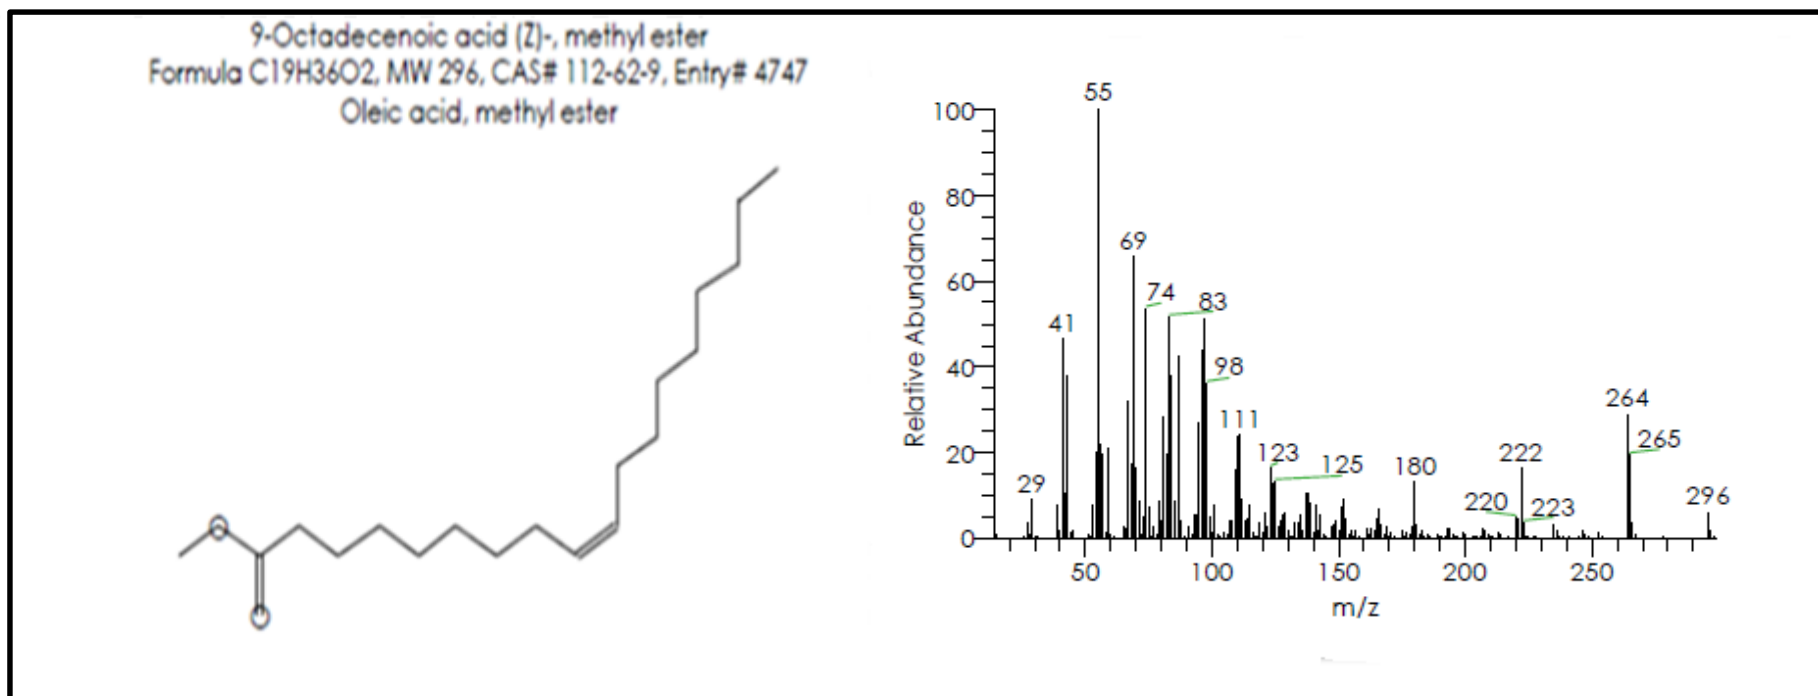

**Figure S28: MS spectrum for 9-Octadecenoic acid (z)-methyl ester**

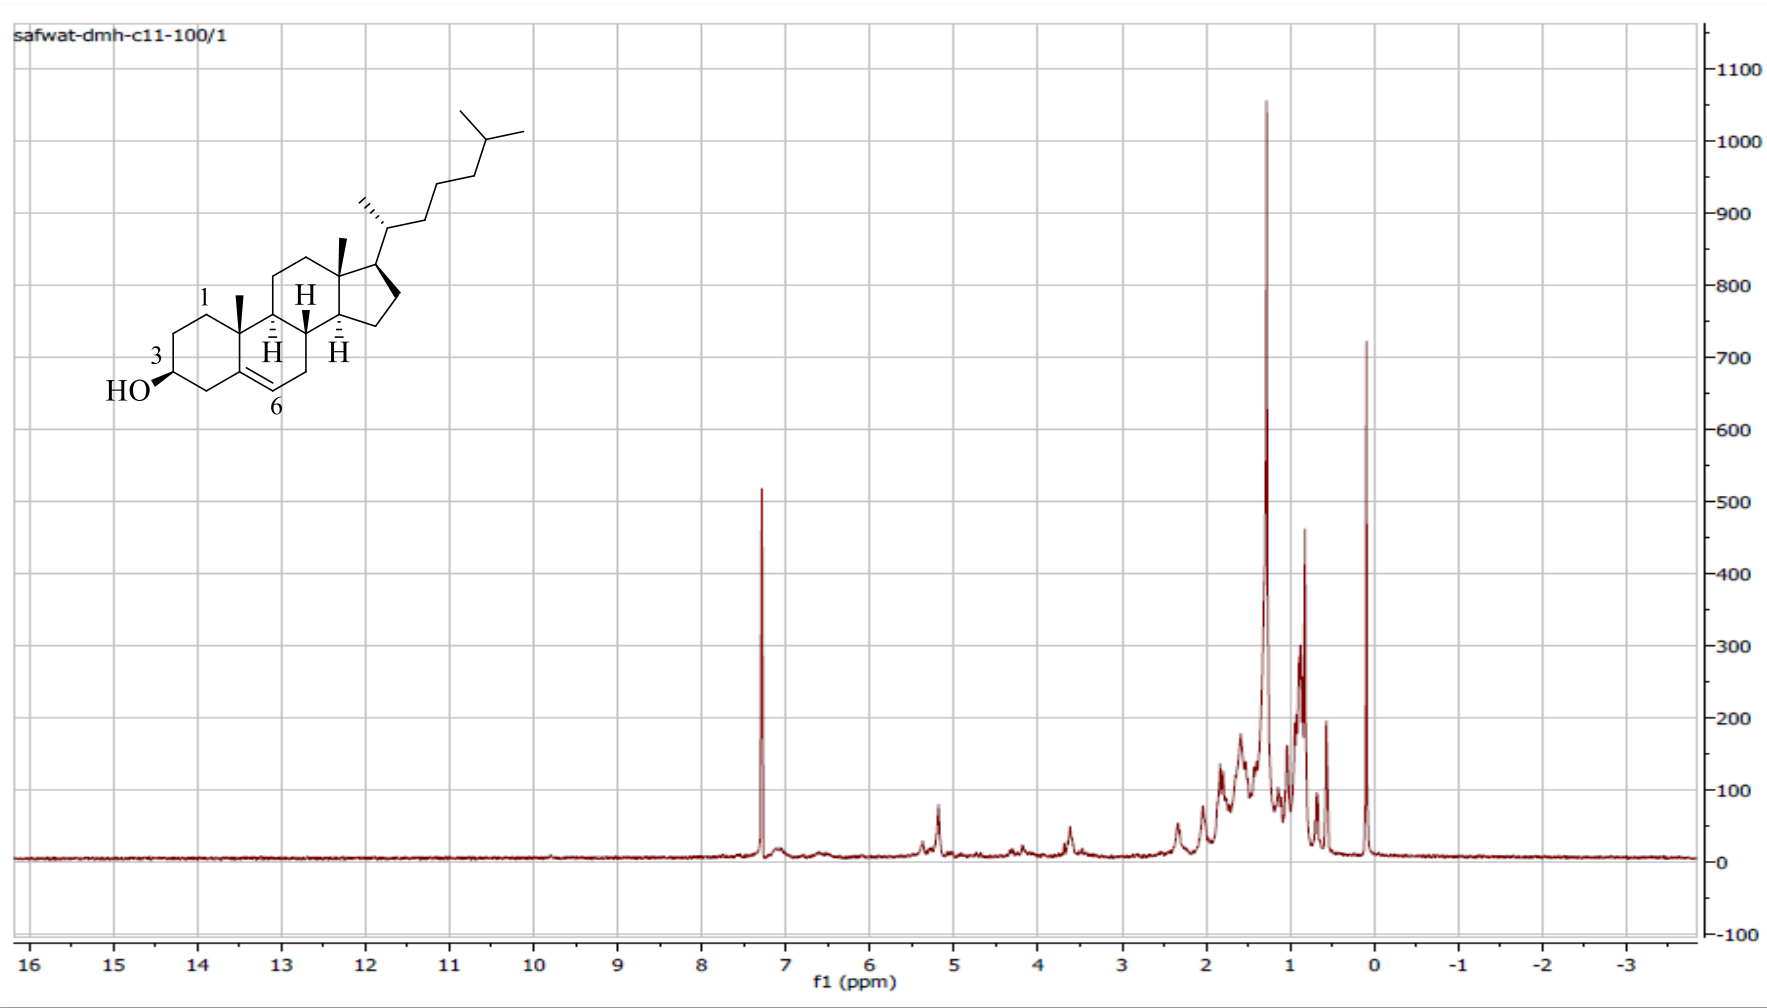

**Figure S29:** <sup>1</sup>H -NMR spectrum of Compound 5 in (CDCl<sub>3</sub>, 400 MHz).



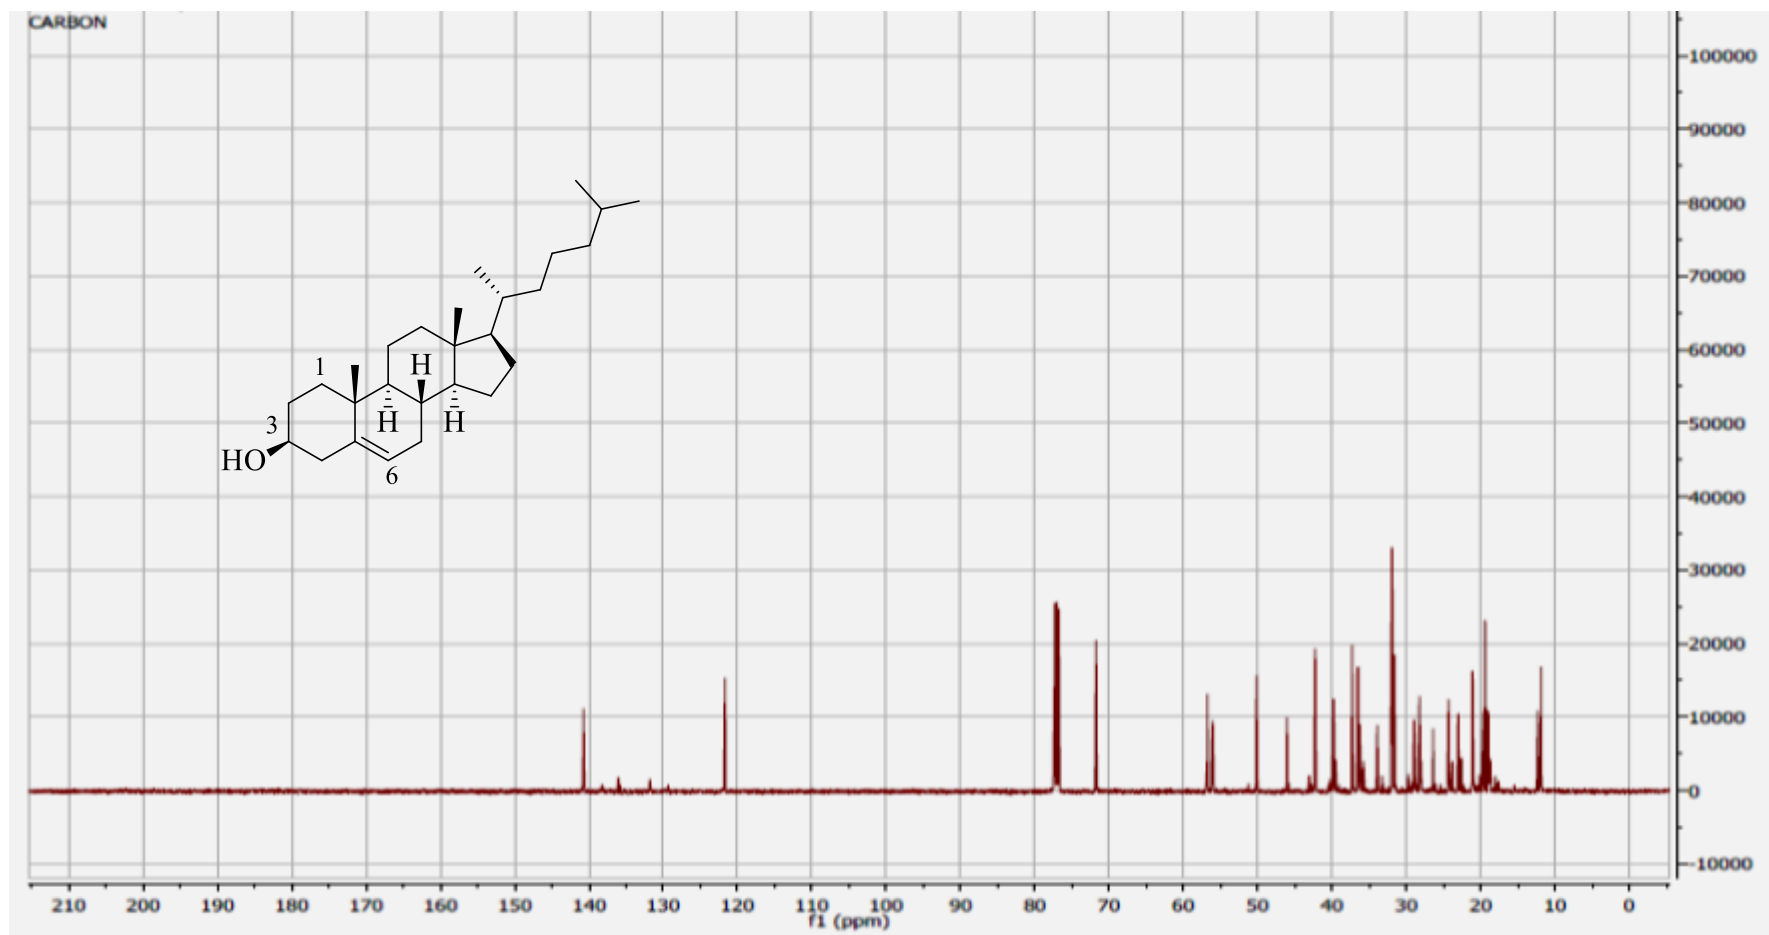

**Figure S30:**  $^{13}\text{C}$ -NMR spectrum of Compound 5 ( $\text{CDCl}_3$ , 100 MHz).

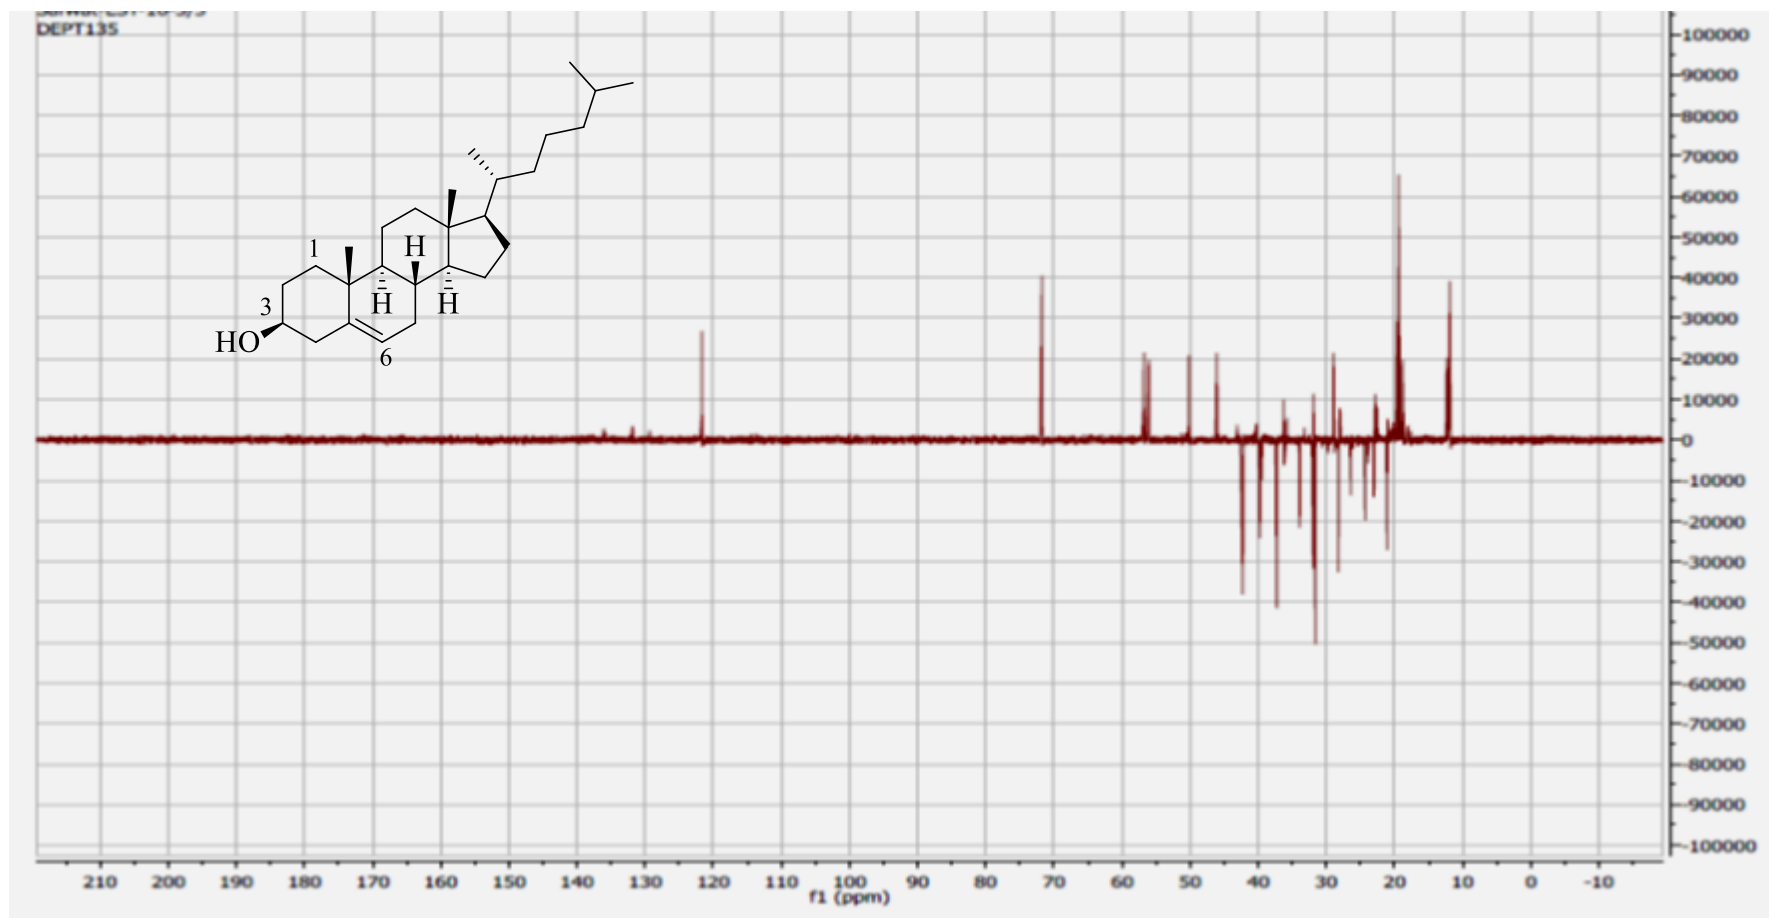

**Figure S31: DEPT spectrum of Compound 5 in (CDCl<sub>3</sub>, 100 MHz).**
